# Supplementary material
Source: Royal Society of Chemistry journal article supplement (doi:10.1039/d6nr01266c)
Supplement: d6nr01266c1.pdf [file d6nr01266c1.pdf]

## Electronic Supplementary Information

# AIE-active supramolecular cross-linked polymer gel based on multiple orthogonal non-covalent interactions with stimulus-responsive properties

Ni Mao,<sup>a</sup> Xiaorong Hou,<sup>a</sup> Xueqi Tian,<sup>\*b</sup> Jianmin Jiao,<sup>b</sup> and Xiao-Yu Hu<sup>\*a,b</sup>

<sup>a</sup>College of Materials Science and Technology, Nanjing University of Aeronautics and Astronautics, Nanjing 211106, P. R. China

<sup>b</sup>College of Chemistry and Materials, Jiangxi Normal University, Nanchang 330022, P. R. China

\*Corresponding Author: [tianxq@jxnu.edu.cn](mailto:tianxq@jxnu.edu.cn); [huxy@nuaa.edu.cn](mailto:huxy@nuaa.edu.cn)

### Table of Contents

|                                                                  |    |
|------------------------------------------------------------------|----|
| 1. General information .....                                     | 2  |
| 2. Synthetic procedures and characterization data .....          | 2  |
| 3. Crystallographic data for <b>BCE</b> .....                    | 21 |
| 4. AIE properties study .....                                    | 21 |
| 5. Fluorescence quantum yields .....                             | 22 |
| 6. Host-guest interaction study.....                             | 22 |
| 6. Stability of the gel <b>BCE</b> ⊃ <b>G1</b> in solution ..... | 27 |
| 7. References .....                                              | 27 |

## 1. General information

The commercially available reagents and solvents were either employed as purchased or dried according to procedures described in the literatures. All reactions were performed under nitrogen atmosphere unless otherwise stated. Analytical thin layer chromatography (TLC) was performed using 0.25 mm silica gel plates. Column chromatography was performed with silica gel (200-300 mesh) produced by Shanghai Titan Scientific Co., Ltd. All yields were given as isolated yields. NMR spectra ( $^1\text{H}$  NMR,  $^{13}\text{C}$  NMR, and 2D NMR) were recorded on a Bruker Avance 400 MHz spectrometer at room temperature, with tetramethylsilane (TMS) as internal standard and solvent signals as internal references. Chemical shifts ( $\delta$ ) are reported in parts per million (ppm). Multiplicities were abbreviated as follows: d = doublet, t = triplet, q = quartet, m = multiplet, and coupling constant ( $J$ ) in Hertz (Hz). High-resolution electrospray ionization mass spectra (HR-ESI-MS) were recorded on an Orbitrap Exploris 120 equipped with an electrospray ionization (ESI) probe operating in positive-ion mode with direct infusion. UV-visible spectra were recorded with a Shimadzu UV 1780 UV-Vis Spectrophotometer. Scanning electron microscope (SEM) investigations were carried out using a FEI Quanta FEG 250 instrument. Fluorescence spectra were recorded on a Gangdong SCI F-380 fluorescence spectrophotometer. The quantum yields were carried out on a FLS1000 instrument with the integrating sphere. Compounds **4**<sup>1</sup> and **6**<sup>2</sup> were synthesized according to the reported procedures.

## 2. Synthetic procedures and characterization data

### Synthesis of host molecule BCE

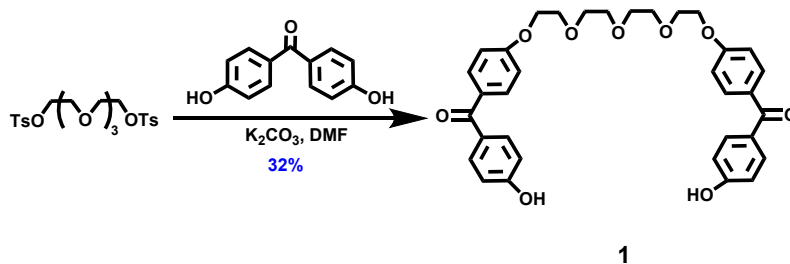

**Scheme S1** Synthesis route of compound **1**.

### Synthesis of compound **1**

Under a nitrogen atmosphere,  $\text{K}_2\text{CO}_3$  (0.45 g, 3 mmol), 4,4'-dihydroxybenzophenone (0.92 g, 4 mmol), and DMF (60 mL) were added to a reaction flask. A solution of tetraethylene glycol di(*p*-methylphenyl sulfonate) (1 g, 2 mmol) in DMF (100 mL) was then added dropwise over 1 h. Subsequently, the reaction solution was refluxed at 95°C overnight. After the reaction is completed, the solvent was removed under reduced pressure, and the crude product was extracted with  $\text{H}_2\text{O}$  and EA. The organic phase was collected

and purified by silica gel column chromatography (DCM/CH<sub>3</sub>OH = 100:1, v/v) to afford compound **1** as a yellow oil (0.38 g, 0.65 mmol, yield: 32%). <sup>1</sup>H NMR (400 MHz, DMSO-*d*<sub>6</sub>, 298 K) δ 10.31 (s, 2H), 7.66 (d, *J* = 8.2 Hz, 4H), 7.61 (d, *J* = 8.1 Hz, 4H), 7.06 (d, *J* = 8.2 Hz, 4H), 6.88 (d, *J* = 7.9 Hz, 4H), 4.18 (m, 4H), 3.78 (m, 4H), 3.58 (m, 8H). <sup>13</sup>C NMR (100 MHz, DMSO-*d*<sub>6</sub>, 298 K) δ 193.53, 162.78, 162.05, 161.94, 132.61, 132.15, 130.77, 128.95, 115.56, 115.48, 114.60, 70.41, 70.30, 69.24, 67.94. HR-ESI-MS *m/z*: [**1** + H]<sup>+</sup> calcd for [C<sub>34</sub>H<sub>35</sub>O<sub>9</sub>]<sup>+</sup>, 587.2276; found: 587.2278.

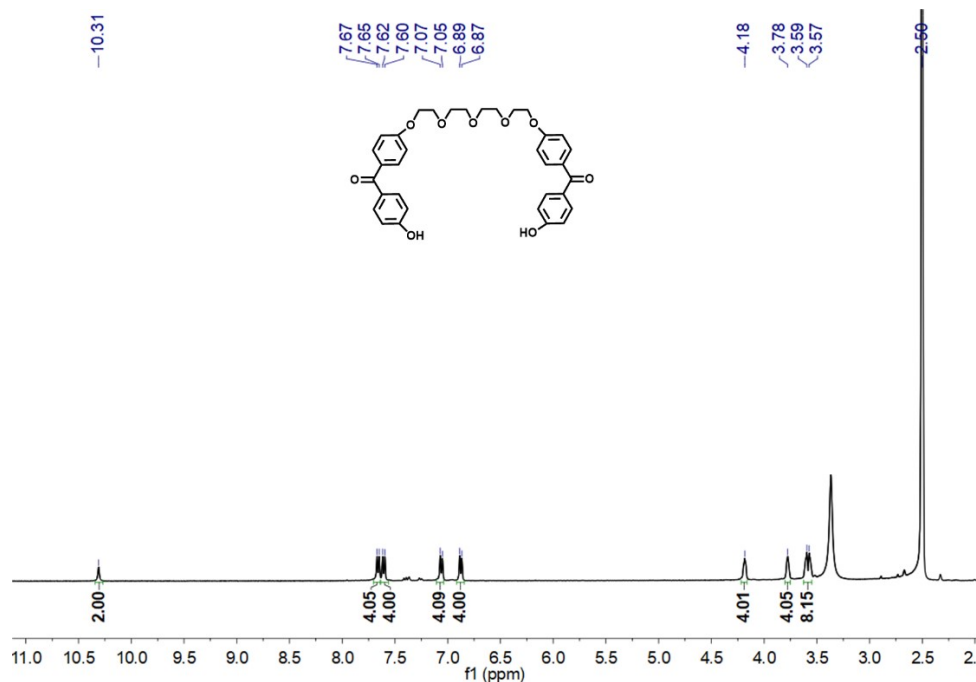

Fig. S1 <sup>1</sup>H NMR (400 MHz, DMSO-*d*<sub>6</sub>, 298 K) spectrum of compound **1**.

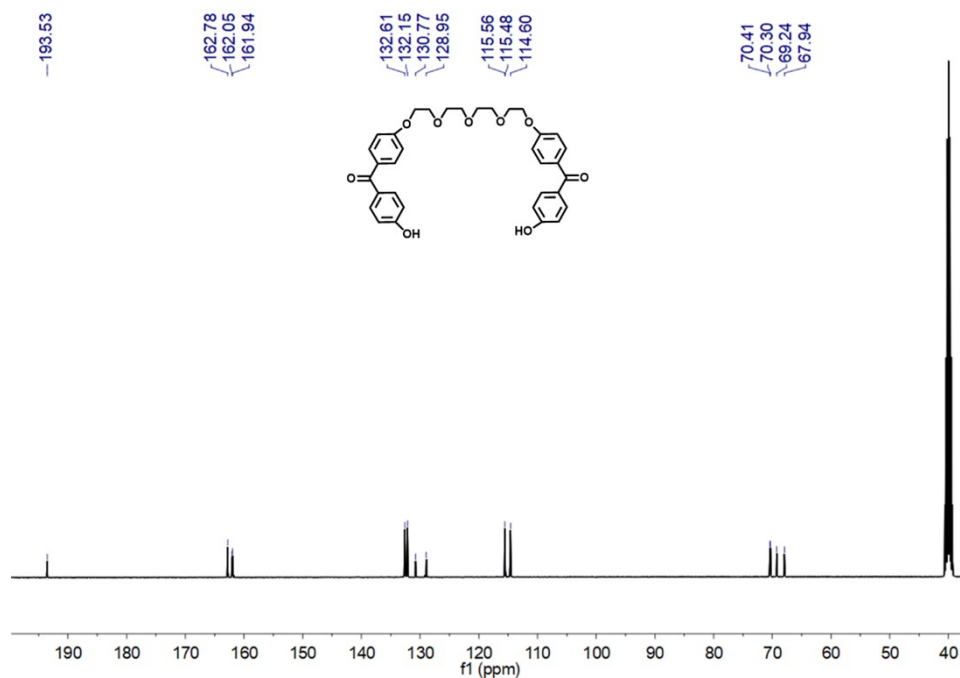

Fig. S2 <sup>13</sup>C NMR (100 MHz, DMSO-*d*<sub>6</sub>, 298 K) spectrum of compound **1**.

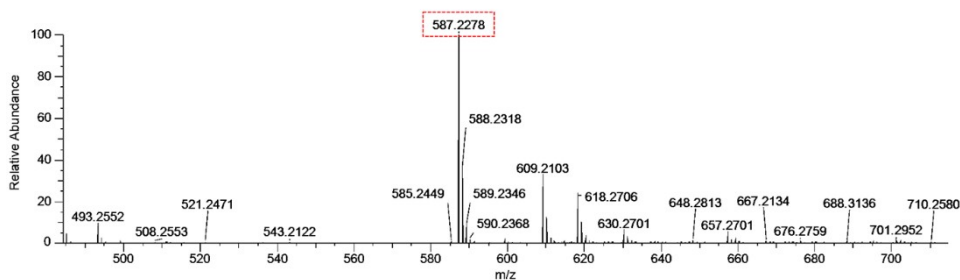

**Fig. S3** HR-ESI-MS spectrum of compound **1**.

### Synthesis of compound **2**

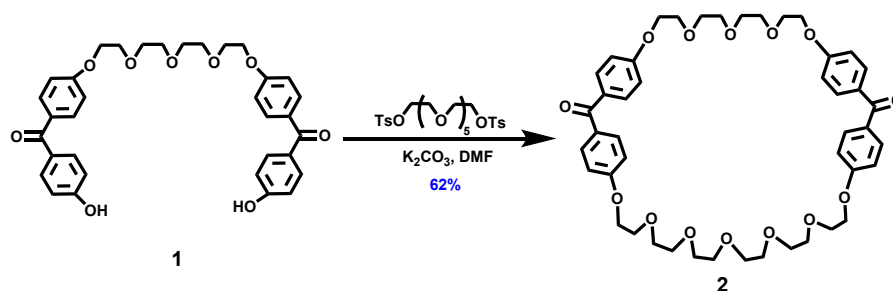

**Scheme S2** Synthesis route of compound **2**.

Under a nitrogen atmosphere,  $K_2CO_3$  (1.95 g, 14.14 mmol), compound **1** (0.48 g, 0.89 mmol), and DMF (150 mL) were added to a reaction flask. A solution of hexylene glycol di(*p*-methylphenyl sulfonate) (0.37 g, 0.89 mmol) in DMF (100 mL) was then added dropwise over 1 h. Subsequently, the reaction solution was refluxed at 95°C overnight. After the reaction is completed, the solvent was removed under reduced pressure, and the crude product was extracted with  $H_2O$  and EA. The organic phase was collected and purified by silica gel column chromatography (PE/EA = 1:1, v/v) to afford compound **2** as a white powder (0.46 g, 0.56 mmol, yield: 62%).  $^1H$  NMR (400 MHz,  $CDCl_3$ , 298 K)  $\delta$  7.70 (d,  $J$  = 8.7 Hz, 8H), 6.91 (d,  $J$  = 8.6 Hz, 8H), 4.19 – 4.09 (m, 8H), 3.86 (dd,  $J$  = 9.0, 4.5 Hz, 8H), 3.73 – 3.59 (m, 24H).  $^{13}C$  NMR (100 MHz,  $CDCl_3$ , 298 K)  $\delta$  194.29, 162.10, 132.16, 130.86, 114.11, 70.97, 70.86, 70.75, 69.61, 69.58, 67.75, 67.71. HR-ESI-MS  $m/z$ : [**2** + H] $^+$  calcd for  $[C_{46}H_{57}O_{14}]^+$ , 833.3743; found: 833.3750.

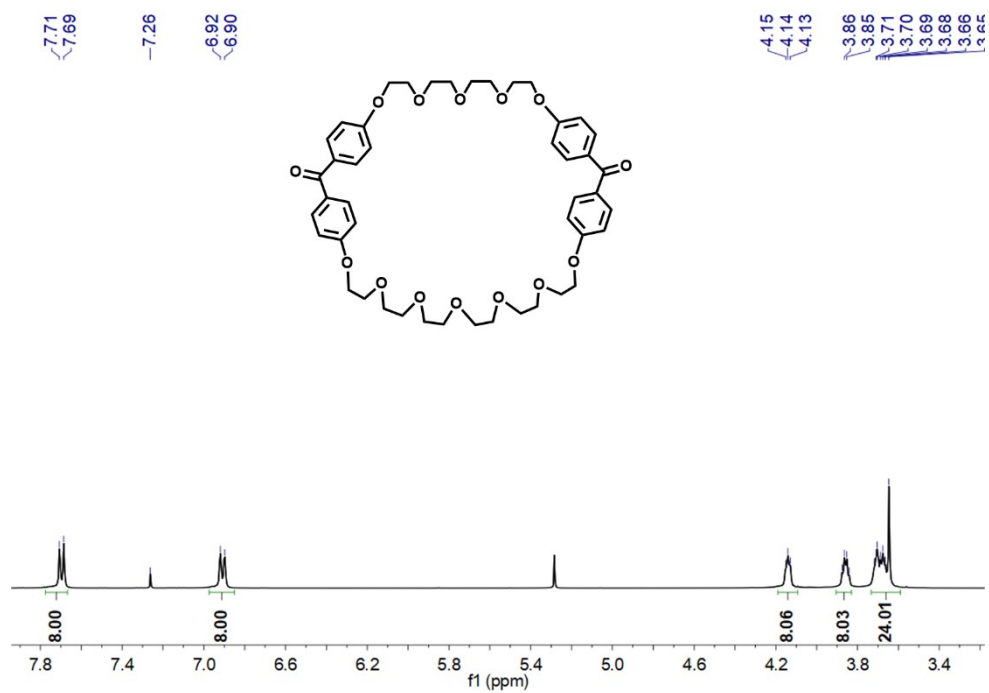

**Fig. S4** <sup>1</sup>H NMR spectrum (400 MHz, CDCl<sub>3</sub>, 298 K) of compound 2.

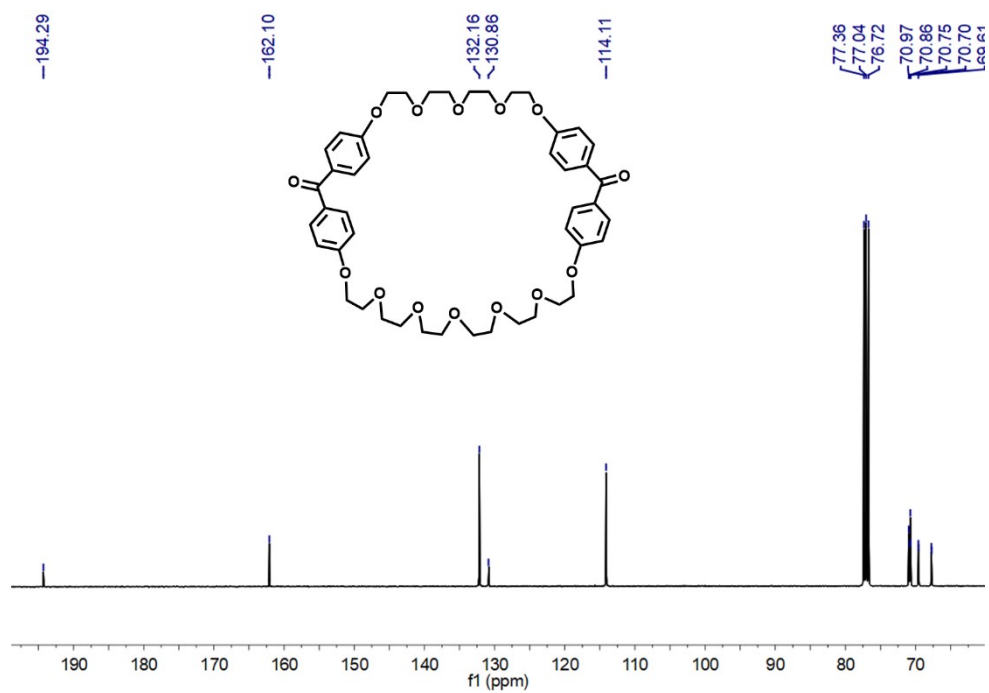

**Fig. S5** <sup>13</sup>C NMR spectrum (100 MHz, CDCl<sub>3</sub>, 298 K) of compound 2.

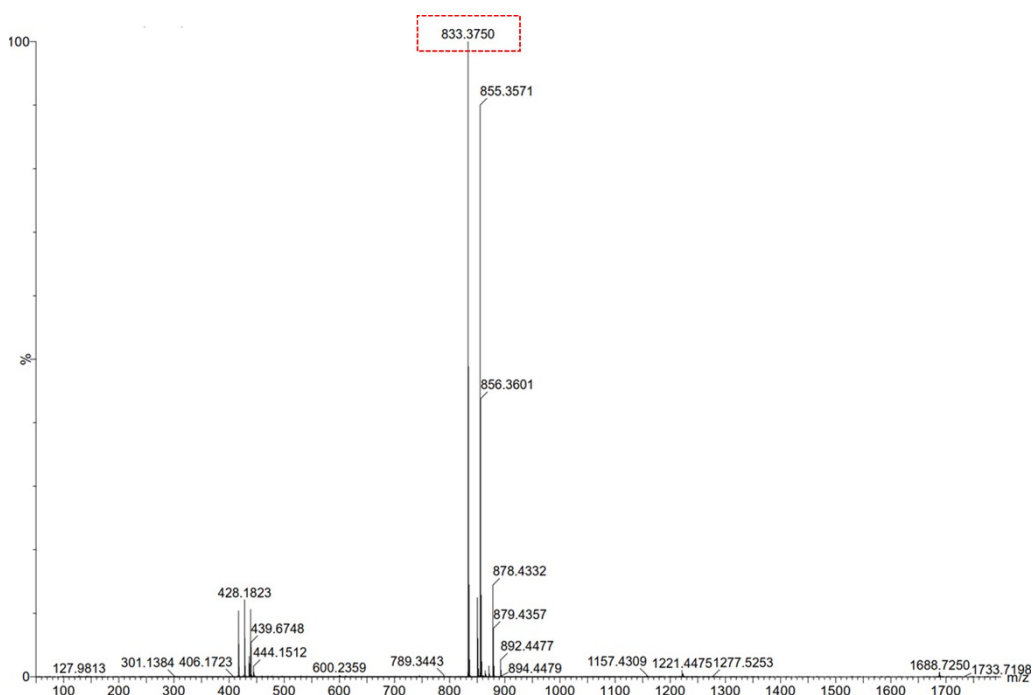

**Fig. S6** HR-ESI-MS spectrum of compound **2**.

### Synthesis of compound **BCE**

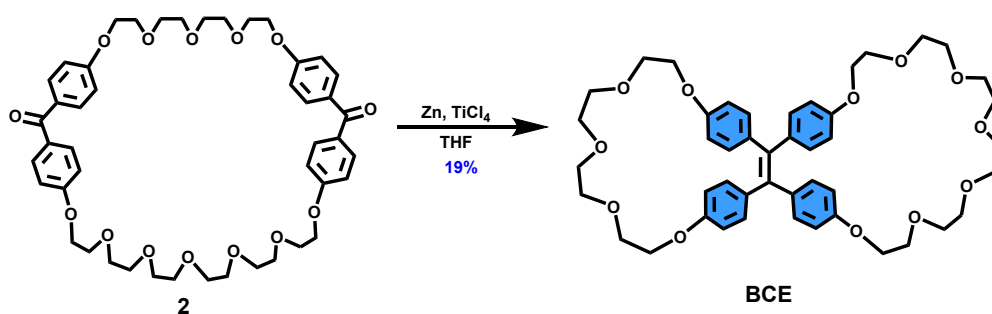

**Scheme S3** Synthesis route of compound **BCE**.

Under a nitrogen atmosphere, zinc powder (0.31 g, 4.8 mmol), compound **2** (0.1 g, 0.12 mmol), and THF (7 mL) were added to a reaction flask. The mixture was cooled to  $-10^{\circ}\text{C}$ , and  $\text{TiCl}_4$  (0.26 mL, 2.4 mmol) was slowly added dropwise. After stirring for 1 h, the reaction mixture was warmed to room temperature and then heated refluxed overnight. Upon completion, the reaction was quenched with 1 M HCl (20 mL). The mixture was filtered, and the organic layer was collected and concentrated. The crude product was purified by silica gel column chromatography (PE/EA = 1:1, v/v) to afford compound **BCE** as a white powder (0.06 g, 0.02 mmol, yield: 19%).  $^1\text{H}$  NMR (400 MHz,  $\text{CDCl}_3$ , 298 K)  $\delta$  6.95 (d,  $J$  = 7.7 Hz, 4H), 6.88 (d,  $J$  = 7.8 Hz, 4H), 6.67 (d,  $J$  = 8.0 Hz, 8H), 4.15 (m, 4H), 4.09 (m, 4H), 3.82 (m, 4H), 3.76 (m, 4H), 3.70 (m, 4H), 3.67 (m, 12H), 3.62 (m, 8H).  $^{13}\text{C}$  NMR (100 MHz,  $\text{CDCl}_3$ , 298 K)  $\delta$  157.18, 139.05, 137.23, 136.37, 132.46, 114.37, 113.84, 71.20, 71.00, 70.86, 70.70, 70.65, 69.67, 67.96, 67.39. HR-ESI-MS  $m/z$ : [**BCE** + Na] $^+$  calcd for  $[\text{C}_{46}\text{H}_{56}\text{O}_{12}\text{Na}]^+$ , 823.3664; found: 823.3684.



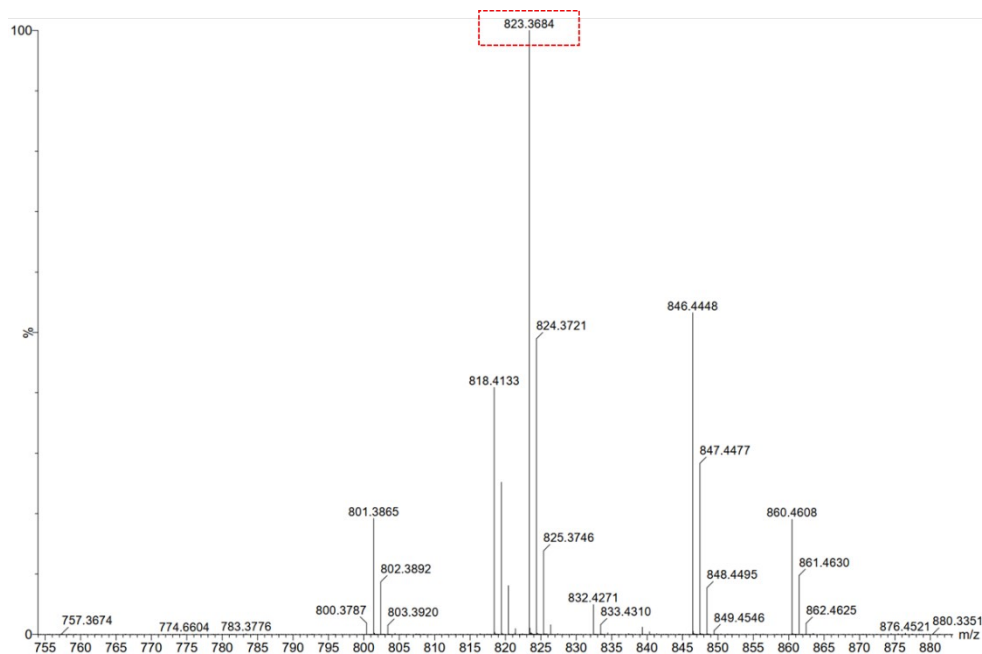

Fig. S9 HR-ESI-MS spectrum of compound BCE.

### Synthesis of polymer G1

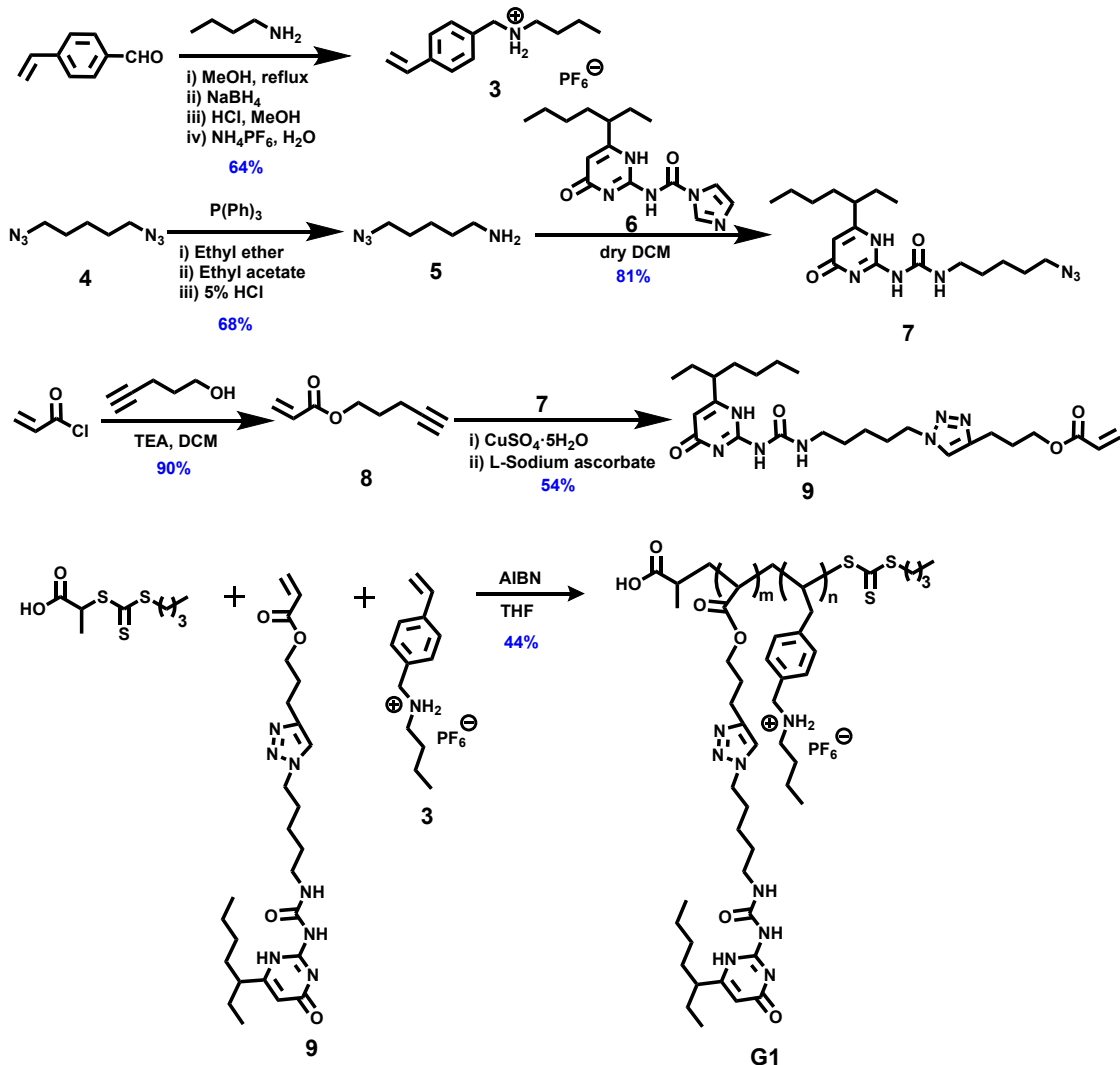

Scheme S4 Synthesis route of polymer G1.

### Synthesis of compound 3<sup>3</sup>

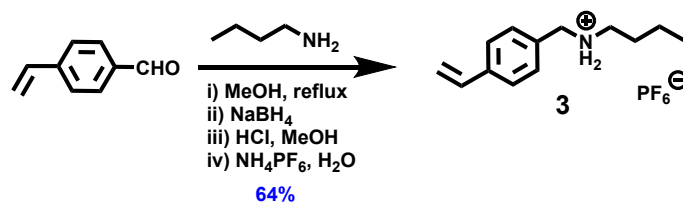

**Scheme S5** Synthesis route of compound 3.

Under a nitrogen atmosphere, 4-vinylbenzaldehyde (0.25 g, 1.89 mmol), *n*-butylamine (0.21 mL, 2.08 mmol), and CH<sub>3</sub>OH (6 mL) were heated at reflux overnight. After cooling the reaction mixture to room temperature, NaBH<sub>4</sub> (0.29 g, 7.56 mmol) was added in batches over 1 h under ice-bath conditions. The solution was stirred under ambient conditions for another 24 h, after which 3 M HCl was added to neutralize the excess NaBH<sub>4</sub>. The mixture was filtered, and CH<sub>3</sub>OH was removed by rotary evaporator. H<sub>2</sub>O was added, and the solution was added to saturated NH<sub>4</sub>PF<sub>6</sub> solution to produce a precipitate. The precipitate was collected by filtration and recrystallized three times from deionized H<sub>2</sub>O to afford compound 3 as a white powder (0.43 g, 1.22 mmol, yield: 64%). <sup>1</sup>H NMR (400 MHz, DMSO-*d*<sub>6</sub>, 298 K) δ 8.65 (s, 2H), 7.56 (d, *J* = 7.9 Hz, 2H), 7.46 (d, *J* = 8.0 Hz, 2H), 6.76 (dd, *J* = 17.6, 10.9 Hz, 1H), 5.91 (d, *J* = 17.7 Hz, 1H), 5.33 (d, *J* = 10.9 Hz, 1H), 4.14 (s, 2H), 2.90 (s, 2H), 1.58 (dt, *J* = 15.4, 7.7 Hz, 2H), 1.39 – 1.25 (m, 2H), 0.89 (t, *J* = 7.3 Hz, 3H).

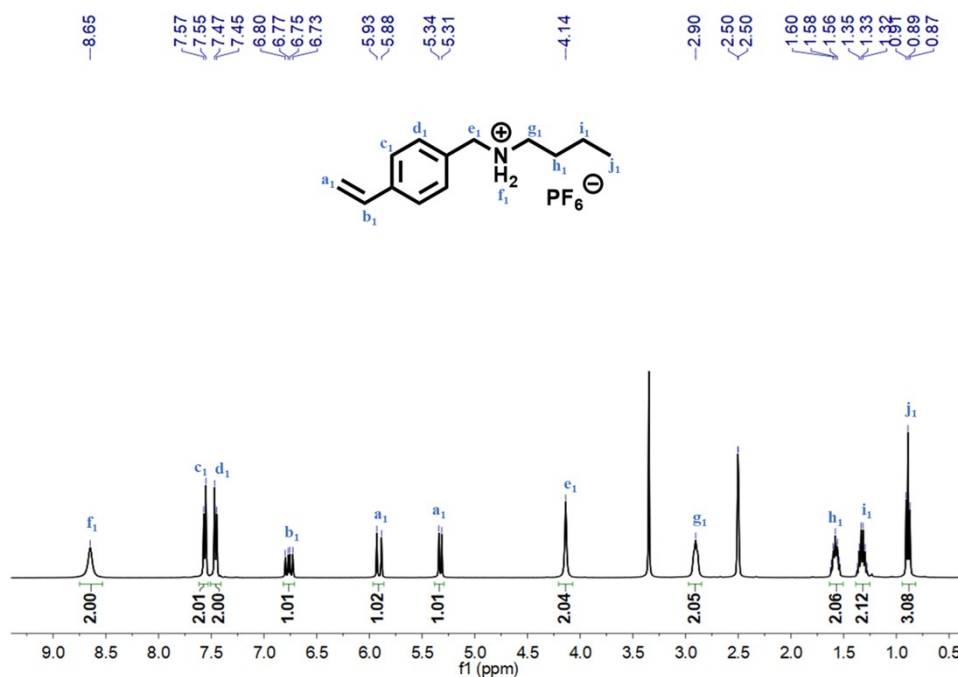

**Fig. S10** <sup>1</sup>H NMR spectrum (400 MHz, DMSO-*d*<sub>6</sub>, 298 K) of compound 3.

### Synthesis of compound 5<sup>1</sup>

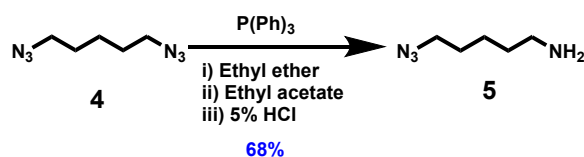

**Scheme S6** Synthesis route of compound **5**.

Under a nitrogen atmosphere, compound **4** (0.15 g, 1 mmol), ethyl ether (1 mL), EA (1 mL), and 5% HCl (3 mL) were added to a reaction flask. Triphenylphosphine (0.25 g, 0.95 mmol) was added portionwise at 0°C. After completion of addition, the reaction mixture was stirred at room temperature for 24 h. The organic layer was discarded, and the aqueous layer was washed with DCM (3 × 6 mL). The resulting aqueous phase was alkaline with sodium hydroxide (pH > 12) and then extracted with DCM. The organic layer was dried over anhydrous Na<sub>2</sub>SO<sub>4</sub> and concentrated under reduced pressure to afford compound **5** as a yellow oil (0.09 g, 0.69 mmol, yield: 68%). <sup>1</sup>H NMR (400 MHz, CDCl<sub>3</sub>, 298 K) δ 3.25 (t, *J* = 6.9 Hz, 2H), 2.68 (t, *J* = 6.8 Hz, 2H), 1.85 (d, *J* = 24.1 Hz, 2H), 1.58 (dd, *J* = 14.4, 7.1 Hz, 2H), 1.50 – 1.35 (m, 4H).

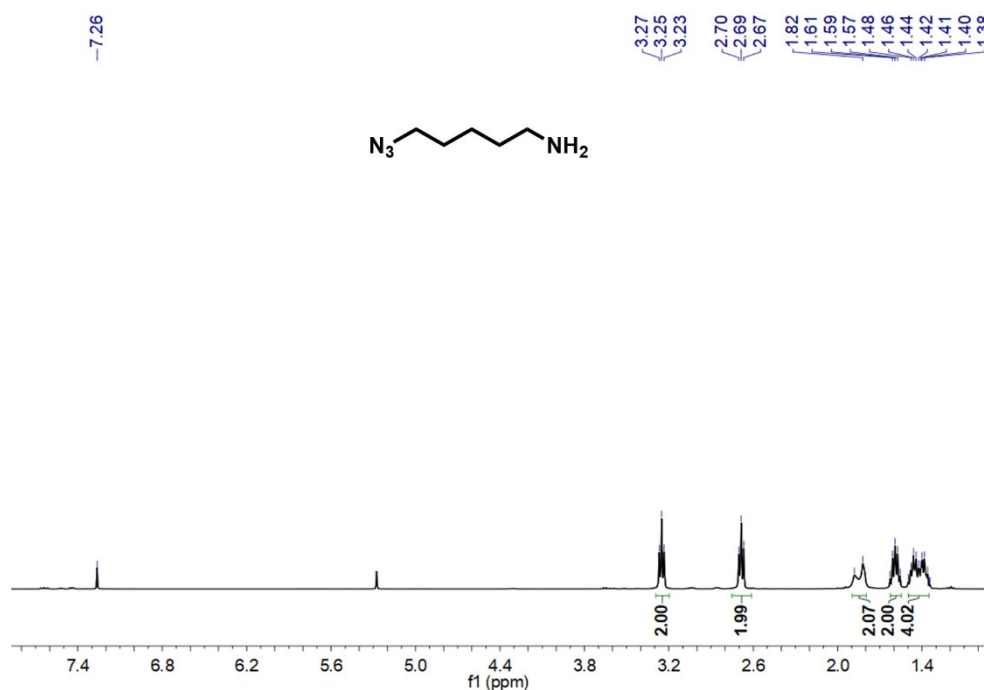

**Fig. S11** <sup>1</sup>H NMR spectrum (400 MHz, CDCl<sub>3</sub>, 298 K) of compound **5**.

Synthesis of compound **7**<sup>4</sup>

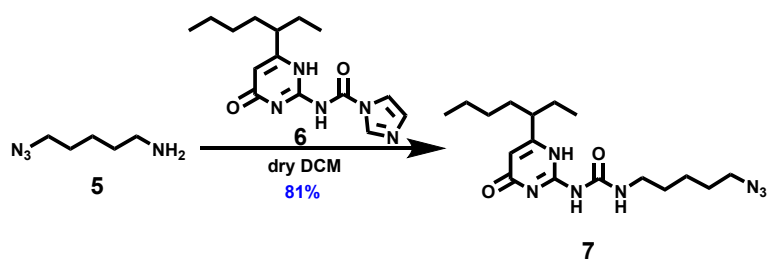

**Scheme S7** Synthesis route of compound **7**.

Under a nitrogen atmosphere, compound **6** (0.24 g, 0.79 mmol), compound **5** (0.09 g, 0.71 mmol), and DCM (5 mL) were added to a reaction flask. The mixture was stirred at room temperature for 4 h. Upon completion of the reaction, the reaction was quenched with H<sub>2</sub>O and stirred for 10 minutes. The reaction mixture was washed three times with saturated NaHCO<sub>3</sub> solution. The resulting organic phase was dried over Na<sub>2</sub>SO<sub>4</sub> and concentrated under reduced pressure to afford compound **7** as a yellow oil (0.21 g, 0.58 mmol, yield: 81%). <sup>1</sup>H NMR (400 MHz, CDCl<sub>3</sub>, 298 K) δ 13.16 (s, 1H), 11.87 (s, 1H), 10.19 (s, 1H), 5.75 (s, 1H), 3.20 (dd, *J* = 13.6, 6.8 Hz, 4H), 2.28 – 2.19 (m, 1H), 1.62 – 1.47 (m, 8H), 1.41 – 1.34 (m, 2H), 1.25 – 1.15 (m, 4H), 0.85 – 0.78 (m, 6H). HR-ESI-MS *m/z*: [**7** + H]<sup>+</sup> calcd for [C<sub>17</sub>H<sub>30</sub>O<sub>2</sub>N<sub>7</sub>]<sup>+</sup>, 364.2455; found: 364.2462.

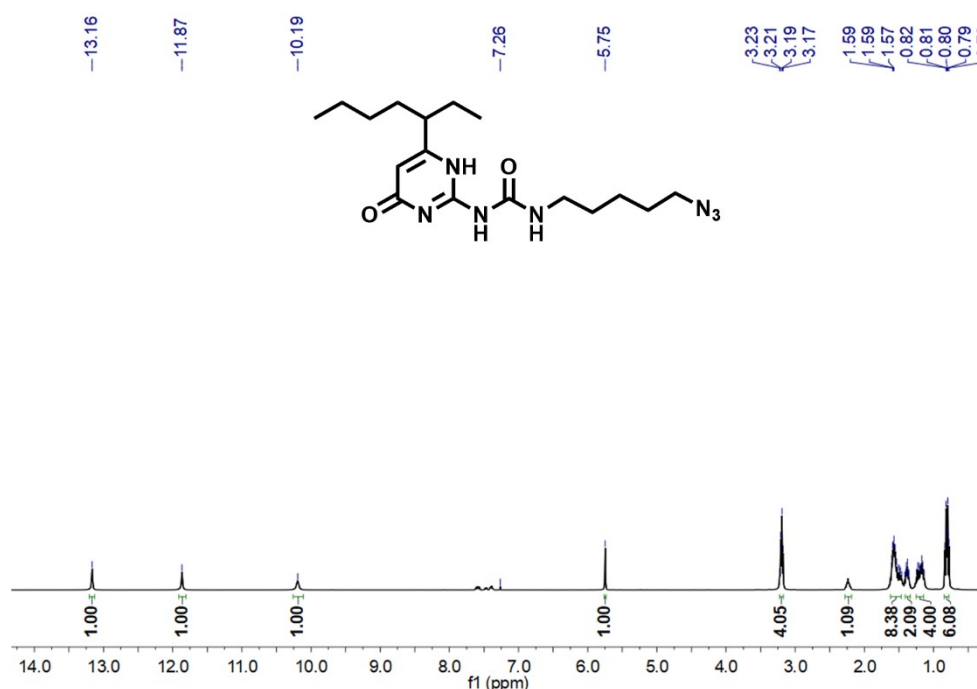

**Fig. S12** <sup>1</sup>H NMR spectrum (400 MHz, CDCl<sub>3</sub>, 298 K) of compound **7**.

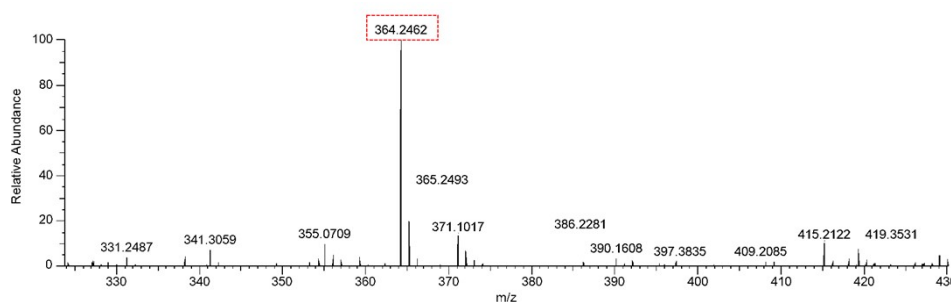

**Fig. S13** HR-ESI-MS spectrum of compound **7**.

Synthesis of compound **8**<sup>5</sup>

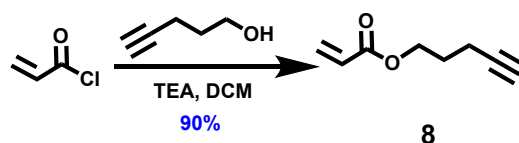



Na<sub>2</sub>SO<sub>4</sub>. The solvent was removed under reduced pressure, and the crude product was purified by silica gel column chromatography (DCM/CH<sub>3</sub>OH = 100:1, v/v) to afford compound **9** as a white powder (0.35 g, 0.69 mmol, yield: 54%). <sup>1</sup>H NMR (400 MHz, DMSO-*d*<sub>6</sub>, 298 K) δ 11.49 (s, 1H), 9.64 (s, 1H), 7.88 (s, 1H), 7.37 (s, 1H), 6.32 (d, *J* = 17.2, 1H), 6.18 (dd, *J* = 17.3, 10.2 Hz, 1H), 5.94 (dd, *J* = 10.2, 1.2 Hz, 1H), 5.74 (s, 1H), 4.29 (t, *J* = 7.0 Hz, 2H), 4.13 (t, *J* = 6.5 Hz, 2H), 3.13 (dd, *J* = 12.6, 6.4 Hz, 2H), 2.68 (t, *J* = 7.6 Hz, 2H), 2.23 (dd, *J* = 10.3, 4.8 Hz, 1H), 1.94 (dt, *J* = 13.9, 6.8 Hz, 2H), 1.81 (dt, *J* = 14.6, 7.2 Hz, 2H), 1.48 (dd, *J* = 16.3, 9.2 Hz, 4H), 1.24 (m, 6H), 1.13 (dd, *J* = 9.3, 5.8 Hz, 2H), 0.84 – 0.74 (m, 6H). <sup>1</sup>H NMR (400 MHz, CDCl<sub>3</sub>, 298 K) δ 13.22 (s, 1H), 11.92 (s, 1H), 10.27 (s, 1H), 7.32 (s, 1H), 6.41 (d, *J* = 17.5 Hz, 1H), 6.13 (dd, *J* = 17.3, 10.3 Hz, 1H), 5.83 (d, *J* = 13.4 Hz, 2H), 4.33 (t, *J* = 7.3 Hz, 2H), 4.22 (t, *J* = 6.4 Hz, 2H), 3.26 (dd, *J* = 12.7, 6.5 Hz, 2H), 2.82 (t, *J* = 7.6 Hz, 2H), 2.32 (d, *J* = 5.3 Hz, 1H), 2.08 (dt, *J* = 13.9, 6.8 Hz, 2H), 1.93 (dd, *J* = 14.9, 7.4 Hz, 2H), 1.67 (d, *J* = 7.8 Hz, 4H), 1.56 (m, 2H), 1.46 – 1.38 (m, 2H), 1.31 – 1.21 (m, 4H), 0.88 (m, 6H). <sup>13</sup>C NMR (100 MHz, CDCl<sub>3</sub>, 298 K) δ 173.22, 166.31, 156.75, 155.64, 146.92, 130.89, 128.46, 120.75, 63.71, 50.14, 45.37, 39.64, 32.93, 30.05, 29.35, 26.65, 22.52, 22.22, 11.77. HR-ESI-MS *m/z*: [**9** + H]<sup>+</sup> calcd for [C<sub>25</sub>H<sub>40</sub>N<sub>7</sub>O<sub>4</sub>]<sup>+</sup>, 502.3136; found: 502.3112.

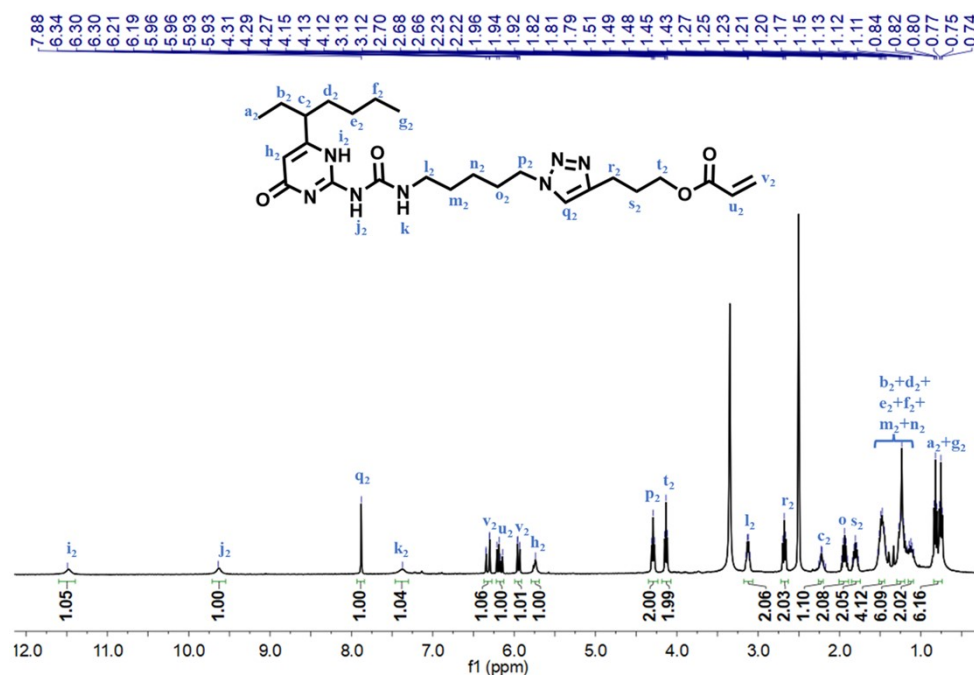

**Fig. S15** <sup>1</sup>H NMR spectrum (400 MHz, DMSO-*d*<sub>6</sub>, 298 K) of compound **9**.

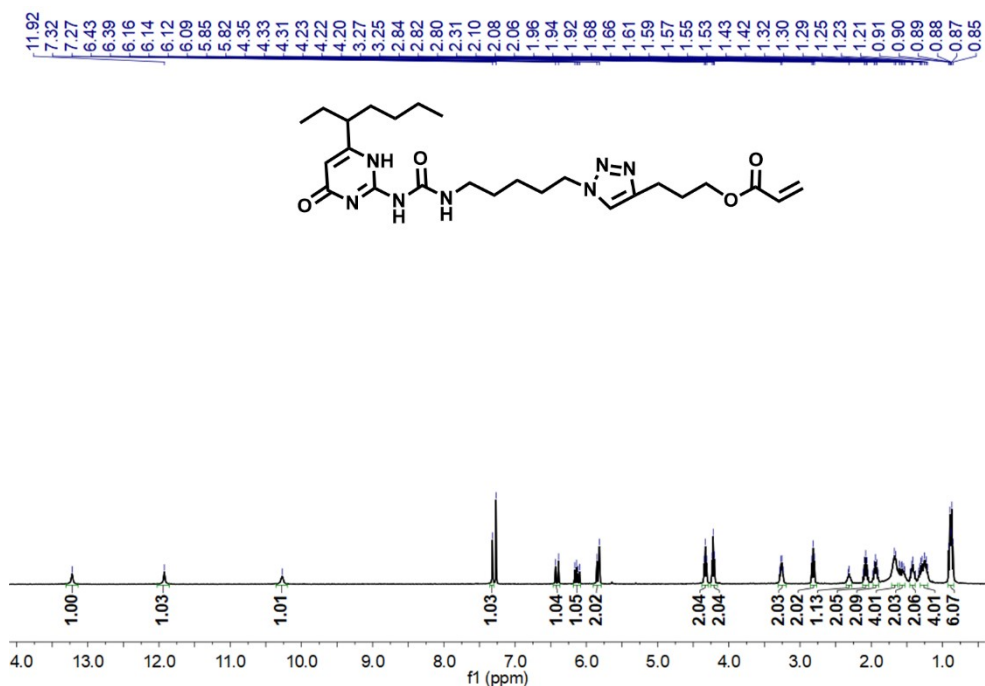

Fig. S16 <sup>1</sup>H NMR spectrum (400 MHz, CDCl<sub>3</sub>, 298 K) of compound 9.

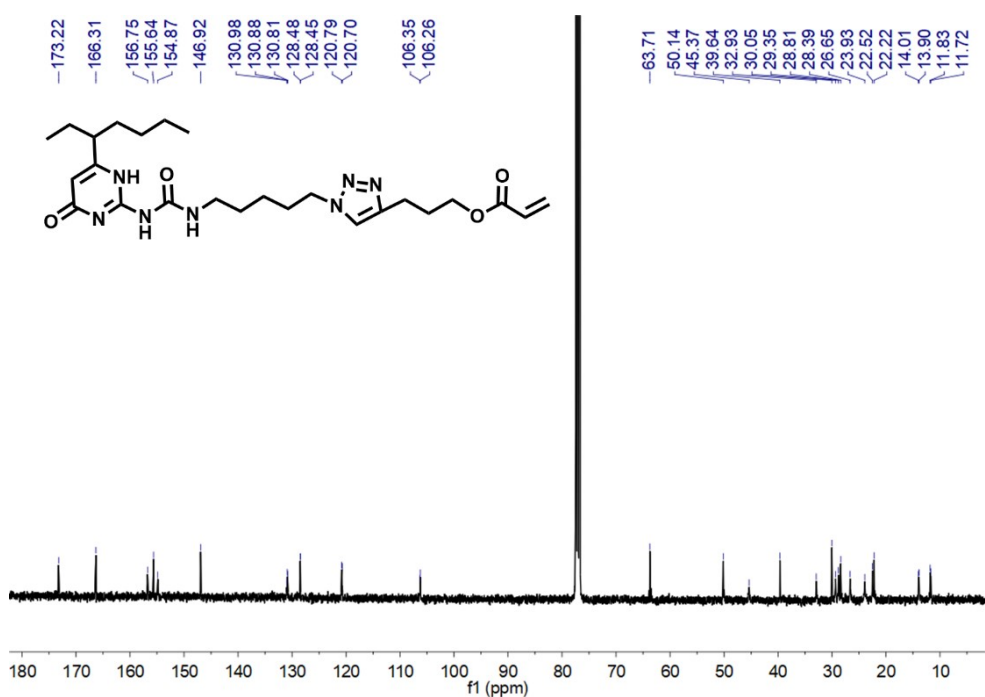

Fig. S17 <sup>13</sup>C NMR spectrum (100 MHz, CDCl<sub>3</sub>, 298 K) of compound 9.

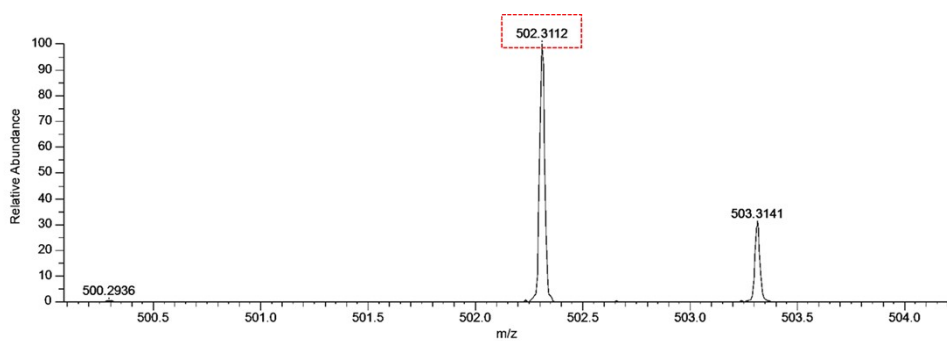

Fig. S18 HR-ESI-MS spectrum of compound 9.

## Synthesis of polymer **G1**

After RAFT polymerization, the  $^1\text{H}$  NMR spectra of the monomers and polymer **G1** were compared. The disappearance of the signals corresponding to the terminal double bonds of the monomers provided preliminary evidence of successful polymerization. Subsequently,  $^1\text{H}$  NMR integration was performed on polymer **G1** to quantify its composition. Based on the integration of the peaks corresponding to the UPy units and dialkylammonium salt groups, the  $m/n$  ratio was calculated to be 1:1. Therefore, the incorporation ratios of both components in polymer **G1** are 50 mol%.

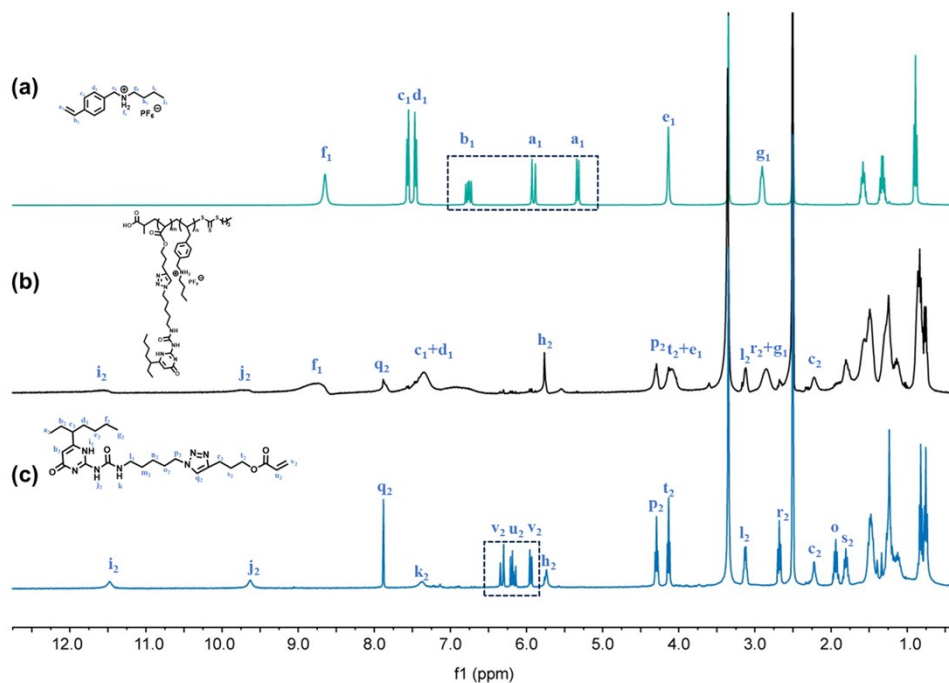

**Fig. S19**  $^1\text{H}$  NMR (400 MHz,  $\text{DMSO-}d_6$ , 298 K) spectra: (a) monomer **3**, (b) polymer **G1**, and (c) monomer **9**.

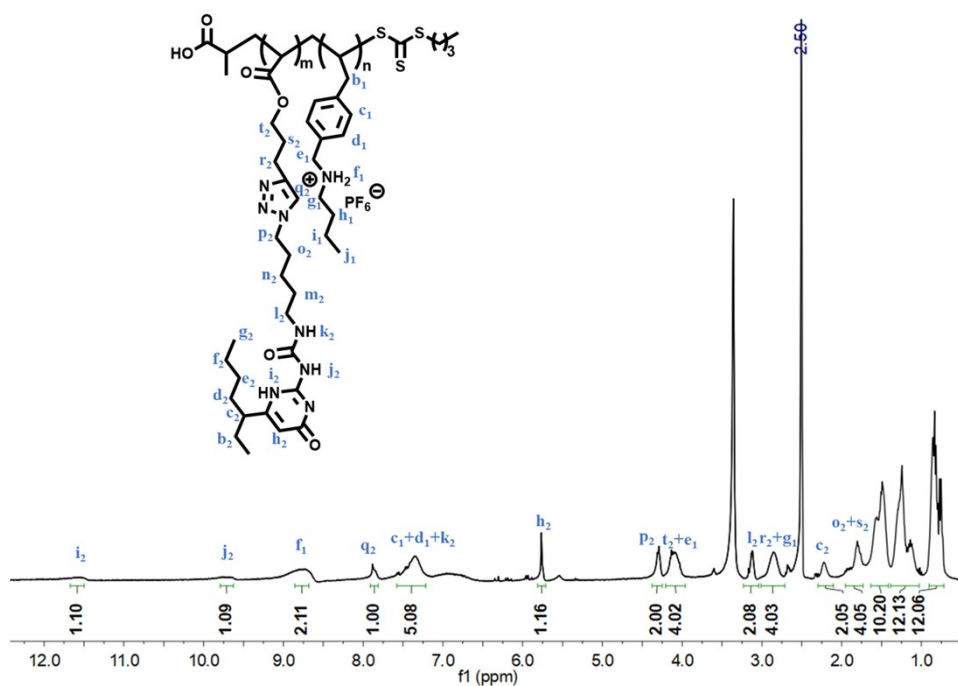

**Fig. S20**  $^1\text{H}$  NMR spectrum (400 MHz,  $\text{DMSO-}d_6$ , 298 K) of polymer **G1**.

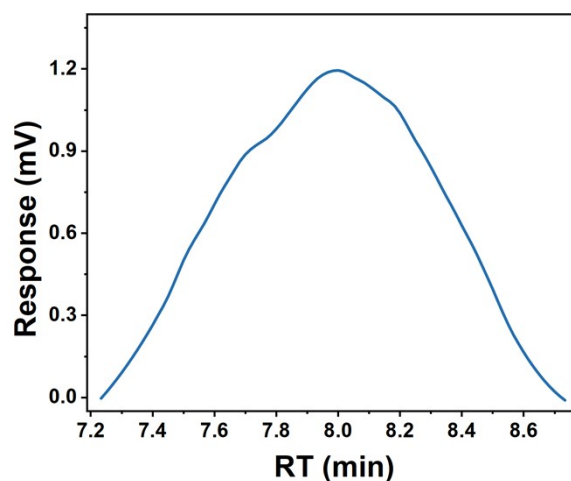

| $M_n$ | $M_w$ | $M_p$ | $M_z$  | $M_{z+1}$ | PDI  |
|-------|-------|-------|--------|-----------|------|
| 53254 | 84706 | 67760 | 134326 | 189911    | 1.59 |

Fig. S21 GPC analysis of polymer **G1** using conventional calculations and DMF as the solvent.

### Synthesis of compound **G2**

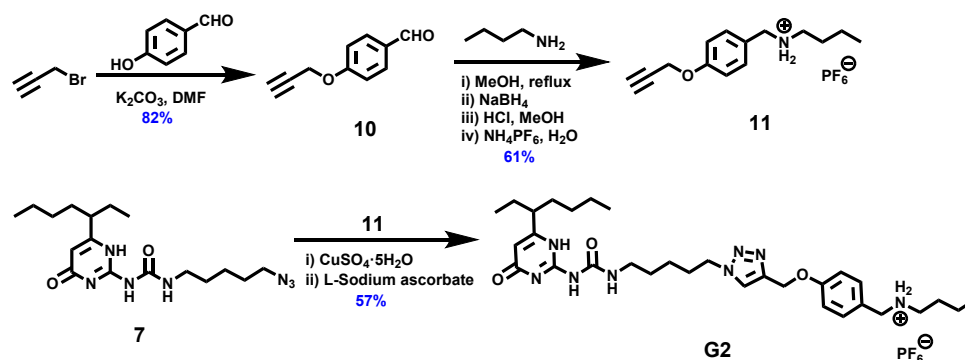

Scheme S10 Synthesis route of compound **G2**.

### Synthesis of compound **10**<sup>6</sup>

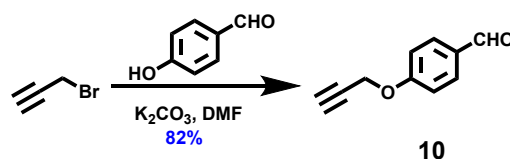

Scheme S11 Synthesis route of compound **10**.

Under a nitrogen atmosphere, *p*-hydroxybenzaldehyde (0.5 g, 4.0 mmol),  $K_2CO_3$  (1.6 g, 12.0 mmol), 3-bromo-1-propyne (0.57 g, 4.8 mmol), and DMF (20 mL) were added to a reaction flask. The reaction mixture was refluxed for 24 h. After the reaction is completed, the solvent was removed under reduced pressure, and the crude product was extracted with  $H_2O$  and DCM. The organic phase was collected and purified by silica gel column chromatography (PE/EA = 10:1, *v/v*) to afford compound **10** as a white powder (0.53 g, 3.3 mmol, yield: 82%).  $^1H$  NMR (400 MHz,  $CDCl_3$ , 298 K)  $\delta$  9.89 (s, 1H), 7.85 (d, *J* =

8.6 Hz, 2H), 7.08 (d,  $J = 8.6$  Hz, 2H), 4.77 (d,  $J = 2.1$  Hz, 2H), 2.57 (s, 1H).

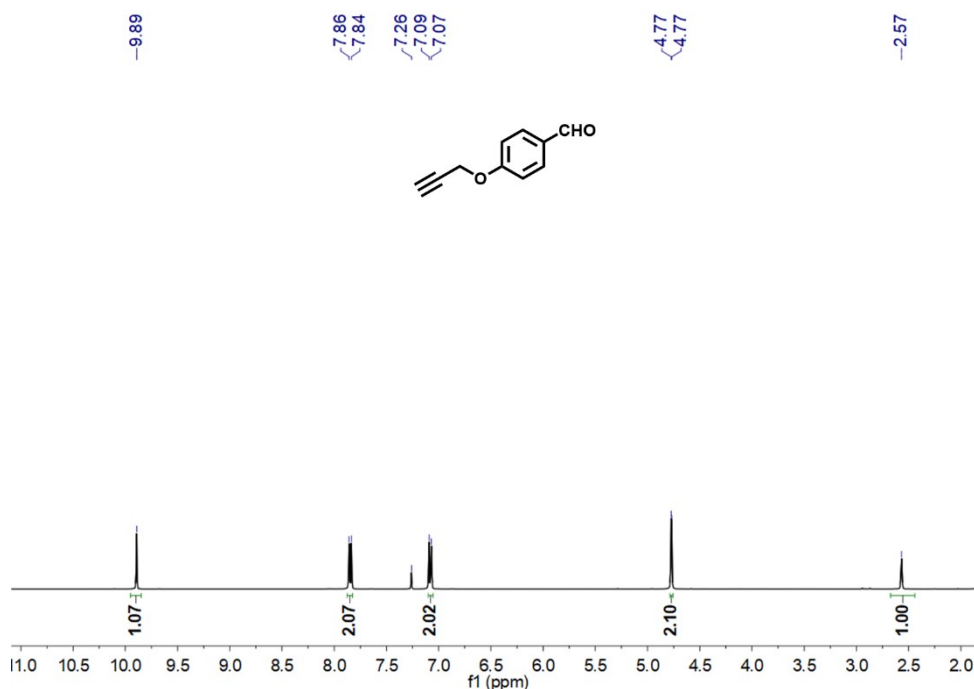

Fig. S22  $^1\text{H}$  NMR spectrum (400 MHz,  $\text{CDCl}_3$ , 298 K) of compound **10**.

Synthesis of compound **11**<sup>7</sup>

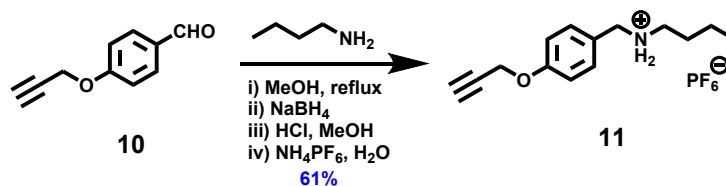

Scheme S12 Synthesis route of compound **11**.

Under a nitrogen atmosphere, compound **10** (0.2 g, 1.24 mmol) and *n*-butylamine (0.17 mL, 1.38 mmol) were sequentially heated to reflux overnight in  $\text{CH}_3\text{OH}$  (6 mL). After cooling the reaction mixture to room temperature,  $\text{NaBH}_4$  (0.1 g, 2.6 mmol) was added to the stirred solution in batches over a period of 1 h under ice-bath conditions. The solution was stirred under ambient conditions for another 24 h, after which 3 M HCl was added to neutralize the excess  $\text{NaBH}_4$ . The mixture was filtered and  $\text{CH}_3\text{OH}$  was removed by rotary evaporator.  $\text{H}_2\text{O}$  was added and the solution was added to saturated  $\text{NH}_4\text{PF}_6$  solution to produce a precipitate, which was collected by filtration and recrystallized three times in deionized  $\text{H}_2\text{O}$  to afford compound **11** as a white powder (0.25 g, 0.68 mmol, yield: 61%).  $^1\text{H}$  NMR (400 MHz,  $\text{CD}_3\text{CN}$ , 298 K)  $\delta$  7.43 (d,  $J = 8.5$  Hz, 2H), 7.07 (d,  $J = 8.6$  Hz, 2H), 4.80 (d,  $J = 2.2$  Hz, 2H), 4.12 (s, 2H), 3.06 – 2.99 (m, 2H), 2.87 (s, 1H), 1.68 – 1.60 (m, 2H), 1.40 (dt,  $J = 14.8, 7.3$  Hz, 2H), 0.96 (t,  $J = 7.3$  Hz, 3H).

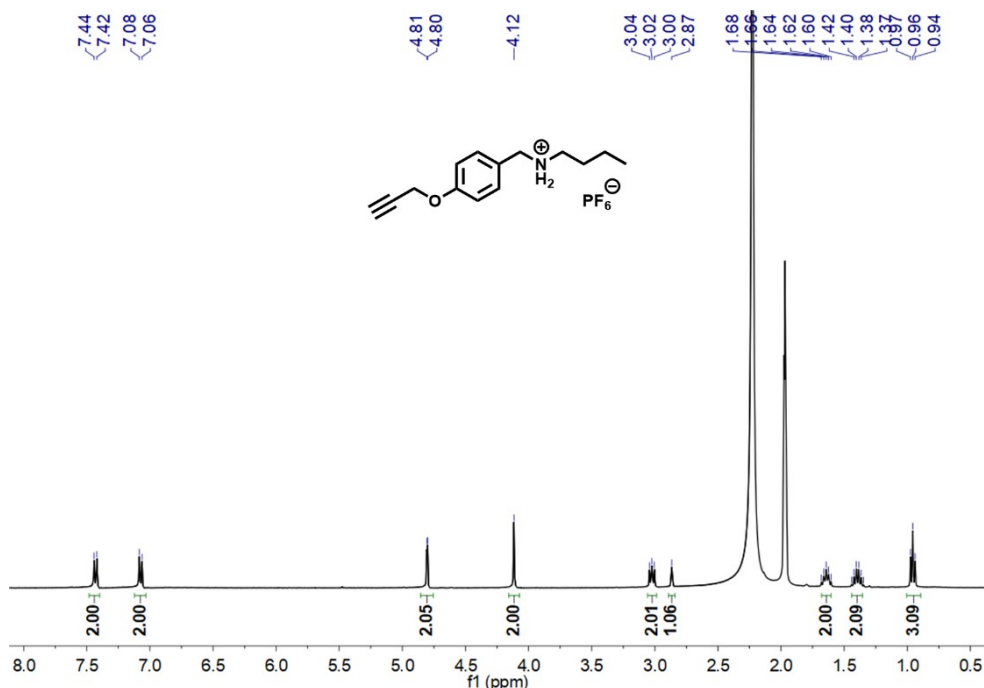

**Fig. S23**  $^1\text{H}$  NMR spectrum (400 MHz,  $\text{CD}_3\text{CN}$ , 298 K) of compound **11**.

#### Synthesis of compound **G2**

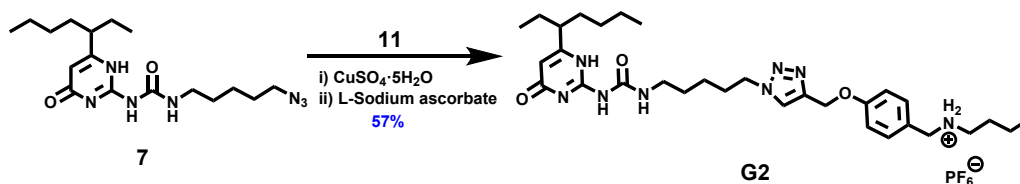

**Scheme S13** Synthesis route of compound **G2**.

Under a nitrogen atmosphere, compound **7** (0.2 g, 0.63 mmol), compound **11** (0.3 g, 0.82 mmol),  $\text{CuSO}_4 \cdot 5\text{H}_2\text{O}$  (0.06 g, 0.23 mmol), L-sodium ascorbate (0.14 g, 0.69 mmol), and a mixed solution of  $\text{DMF}/\text{H}_2\text{O}$  (8.4 mL, 5:1, v/v) were added to the reaction flask and stirred overnight at  $70^\circ\text{C}$ . When the reaction was completed. The solvent was removed by vacuum concentration, the organic phase was successively washed with a saturated sodium carbonate solution in water, and then dried over anhydrous sodium sulfate. The solvent was removed under reduced pressure, and the crude product was purified by silica gel column chromatography ( $\text{DCM}/\text{CH}_3\text{OH} = 100:1$ , v/v) to afford compound **G2** as a yellow oil (0.26 g, 0.36 mmol, yield: 57%).  $^1\text{H}$  NMR (400 MHz,  $\text{DMSO}-d_6$ , 298 K)  $\delta$  11.50 (s, 1H), 9.66 (s, 1H), 8.56 (s, 2H), 8.25 (s, 1H), 7.41 (d,  $J = 8.7$  Hz, 3H), 7.11 (d,  $J = 8.7$  Hz, 2H), 5.75 (s, 1H), 5.15 (s, 2H), 4.37 (t,  $J = 7.0$  Hz, 2H), 4.08 (s, 2H), 3.13 (dd,  $J = 12.5, 6.4$  Hz, 2H), 2.88 (s, 2H), 2.27 – 2.19 (m, 1H), 1.87 – 1.80 (m, 2H), 1.60 – 1.45 (m, 8H), 1.33 – 1.21 (m, 6H), 1.12 (d,  $J = 8.6$  Hz, 2H), 0.89 – 0.74 (m, 9H).  $^{13}\text{C}$  NMR (100 MHz,  $\text{DMSO}-d_6$ , 298 K)  $\delta$  159.01, 131.94, 124.91, 124.57, 115.32, 61.63, 55.38, 50.02, 49.73, 46.58, 33.50, 29.80, 29.56, 29.06, 27.88, 27.04, 23.60, 22.65, 19.74, 14.35, 13.95, 12.28. HR-ESI-MS  $m/z$ : [**G2** –  $\text{PF}_6^-$ ] $^+$  calcd for  $[\text{C}_{31}\text{H}_{49}\text{N}_8\text{O}_3]^+$ , 581.3922; found: 581.3934.

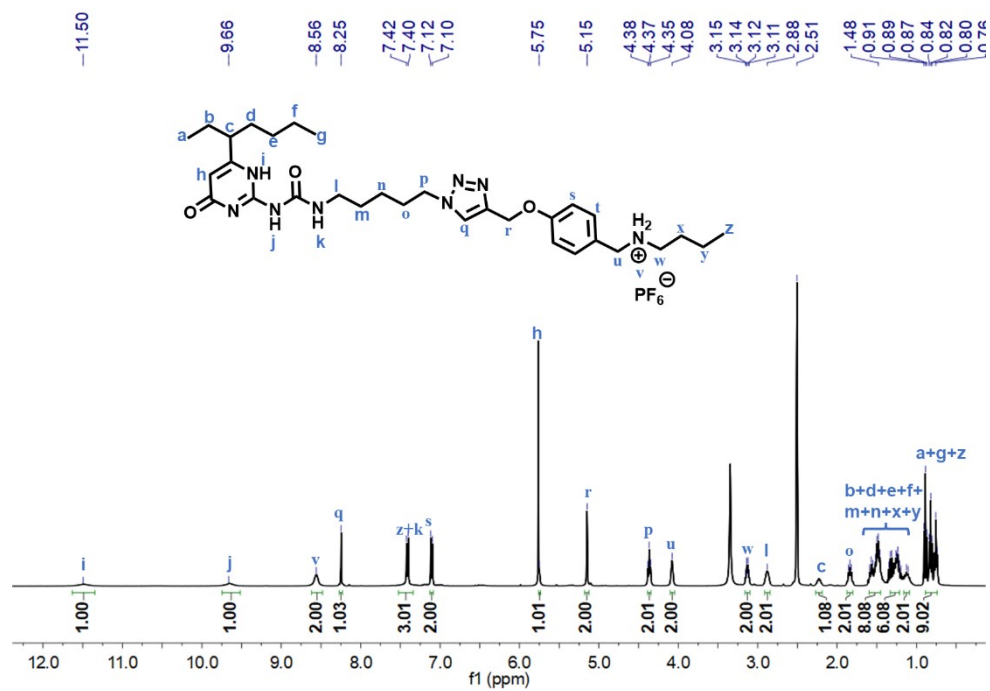

Fig. S24  $^1\text{H}$  NMR spectrum (400 MHz, DMSO- $d_6$ , 298 K) of compound G2.

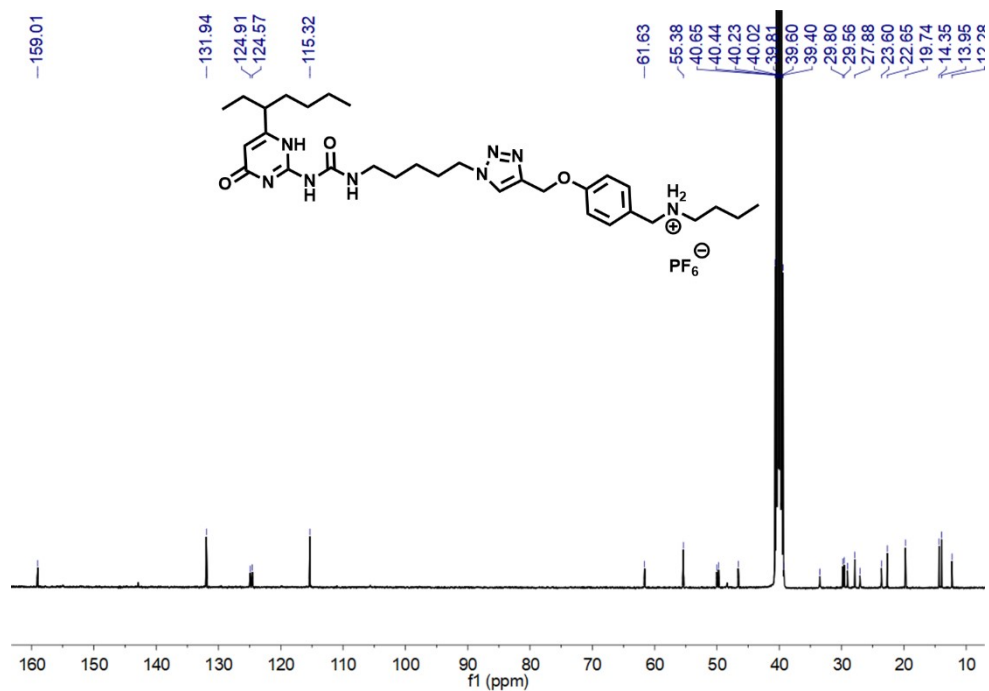

Fig. S25  $^{13}\text{C}$  NMR spectrum (100 MHz, DMSO- $d_6$ , 298 K) of compound G2.

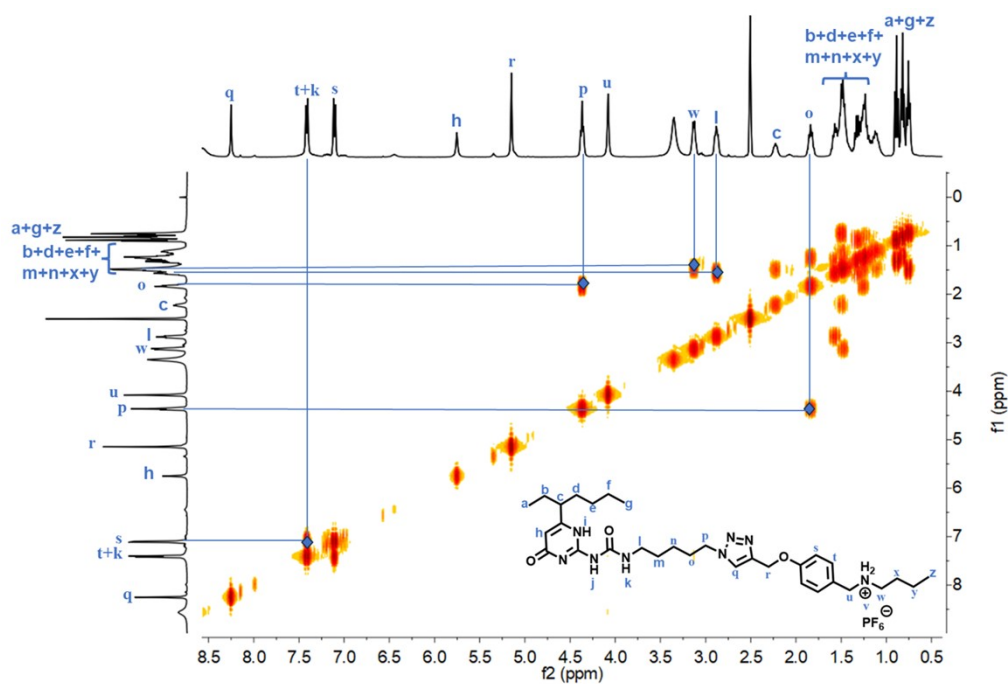

**Fig. S26**  $^1\text{H}$ - $^1\text{H}$  COSY NMR spectrum (400 MHz,  $\text{DMSO-}d_6$ , 298 K) of compound **G2**.

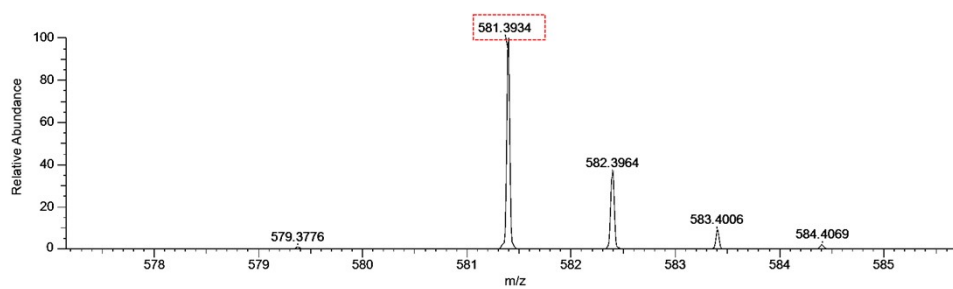

**Fig. S27** HR-ESI-MS spectrum of compound **G2**.

### 3. Crystallographic data for BCE

|                    |                                                                                                                                                                                               |
|--------------------|-----------------------------------------------------------------------------------------------------------------------------------------------------------------------------------------------|
| Structure name     | <b>BCE</b>                                                                                                                                                                                    |
| CCDC number        | 2374870                                                                                                                                                                                       |
| Temperature        | 170.00 K                                                                                                                                                                                      |
| Formula sum        | C <sub>48</sub> H <sub>59</sub> NO <sub>12</sub>                                                                                                                                              |
| <i>Mr</i>          | 841.96                                                                                                                                                                                        |
| Crystal system     | triclinic                                                                                                                                                                                     |
| Space-Group        | $P\bar{1}$                                                                                                                                                                                    |
| Cell parameters    | $a = 12.4293(7) \text{ \AA}$<br>$b = 12.6498(5) \text{ \AA}$<br>$c = 15.7096(7) \text{ \AA}$<br>$\alpha = 106.8050(10)^\circ$<br>$\beta = 106.9150(10)^\circ$<br>$\gamma = 99.8640(10)^\circ$ |
| Cell volume        | 2172.45(18) $\text{\AA}^3$                                                                                                                                                                    |
| <i>Z</i>           | 2                                                                                                                                                                                             |
| $D_{\text{calcd}}$ | 1.287 g cm <sup>-3</sup>                                                                                                                                                                      |
| $\mu$              | 0.479 mm <sup>-1</sup>                                                                                                                                                                        |
| F(000)             | 900.0                                                                                                                                                                                         |
| $R_{\text{all}}$   | 0.0745                                                                                                                                                                                        |

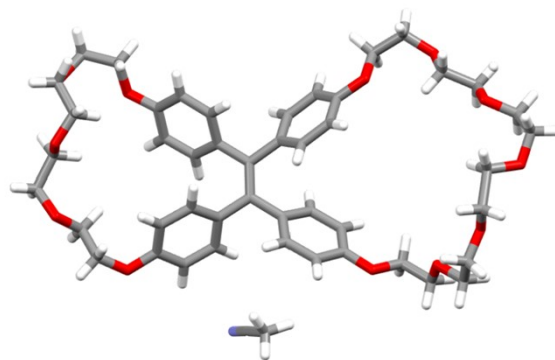

**Fig. S28** Crystal structure and data of **BCE**. (Oxygen atoms, red; Carbon atoms, gray; Hydrogen atoms, white; Nitrogen atom, blue)

### 4. AIE properties study

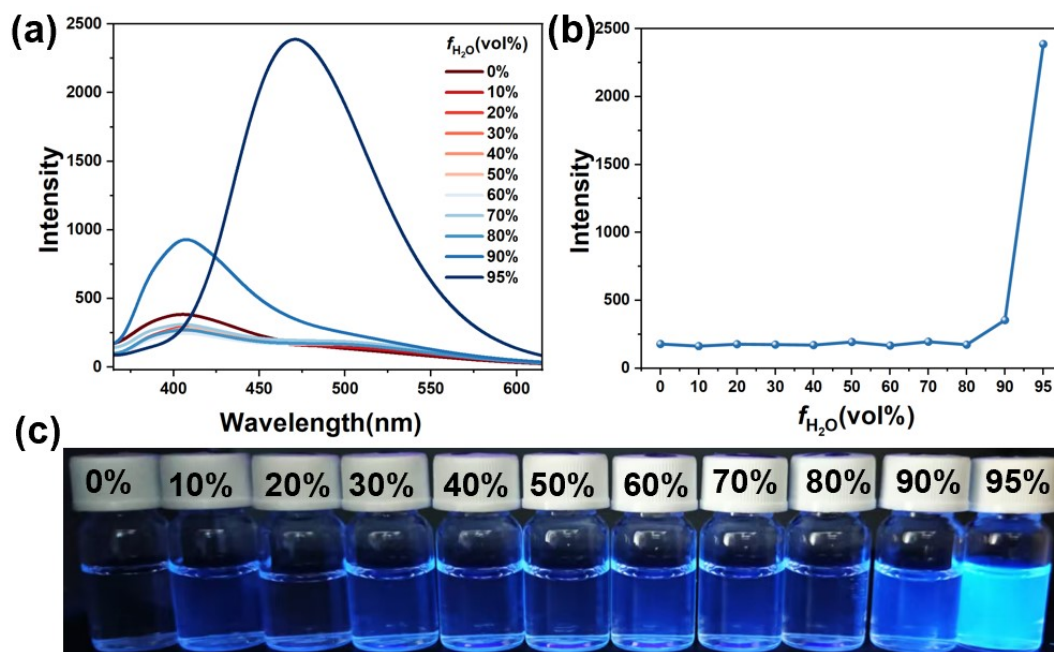

**Fig. S29** (a) Fluorescence spectra of **BCE** in the THF-H<sub>2</sub>O mixture with different H<sub>2</sub>O contents (0-95%). (b) Plot of maximum emission intensity of **BCE** ( $\lambda_{\text{em}} = 470 \text{ nm}$ ). (c) Emission photos of **BCE** in the THF-H<sub>2</sub>O mixture with different H<sub>2</sub>O contents (0-95%) under 365 nm UV-light. [BCE] =  $2 \times 10^{-5} \text{ M}$ .

## 5. Fluorescence quantum yields

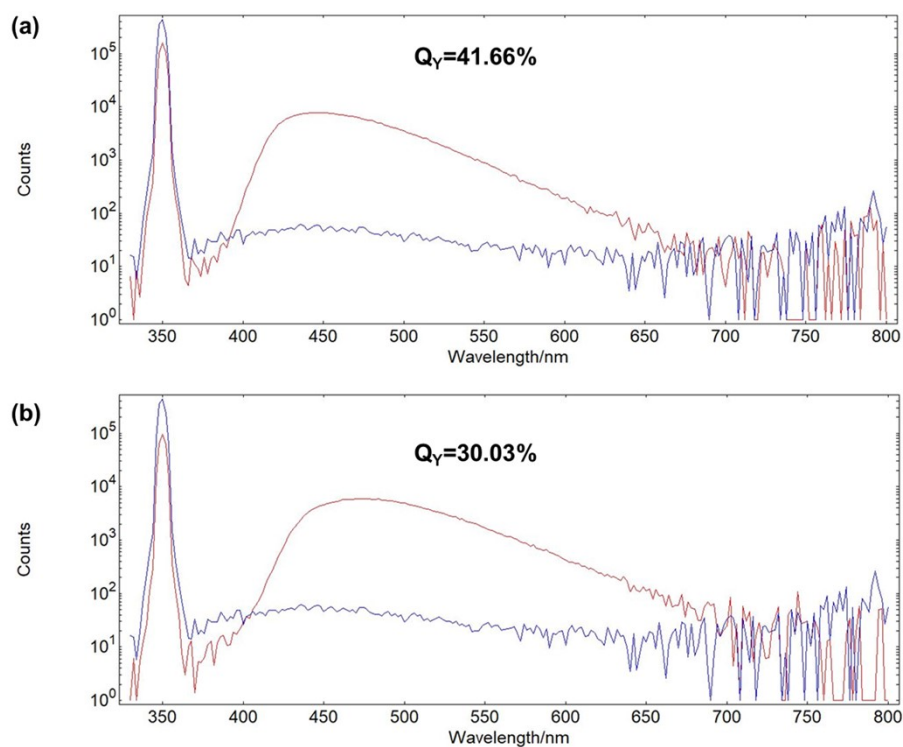

**Fig. S30** Absolute fluorescence quantum yields ( $\Phi_{f(Abs)}$ ) of (a) solid compound **BCE** and (b) the gel **BCE-G1** upon excitation at 350 nm.

## 6. Host-guest interaction study

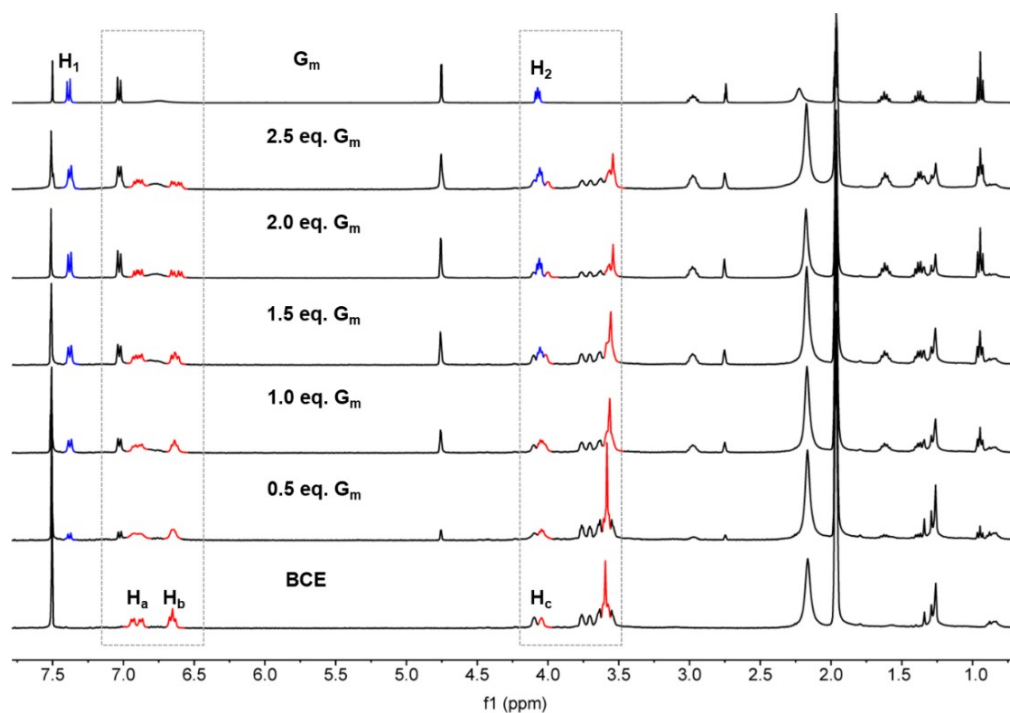

**Fig. S31**  $^1\text{H}$  NMR titration spectra (400 MHz, 298 K) of **BCE** (3.0 mM) titrated by  $G_m$  (0-2.5 equiv.) in  $\text{CDCl}_3/\text{CD}_3\text{CN}$  (2:1, v/v).

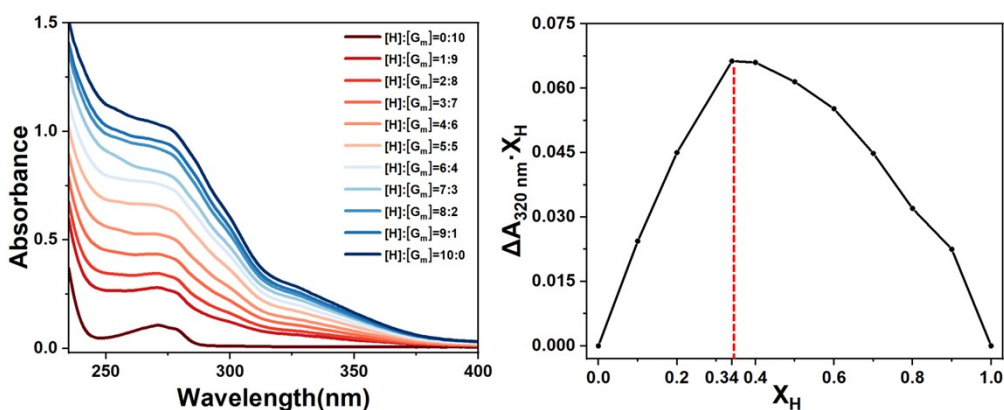

**Fig. S32** UV-vis absorption spectra of **BCE** (**H**) $\supset$ **G<sub>m</sub>** complex and Job's plot of the 2:1 binding ratio between **BCE** and **G<sub>m</sub>** ( $[\text{BCE}] + [\text{G}_m] = 4.0 \times 10^{-5} \text{ M}$ , solvent:  $\text{CDCl}_3/\text{CD}_3\text{CN}$  (2:1, v/v)).

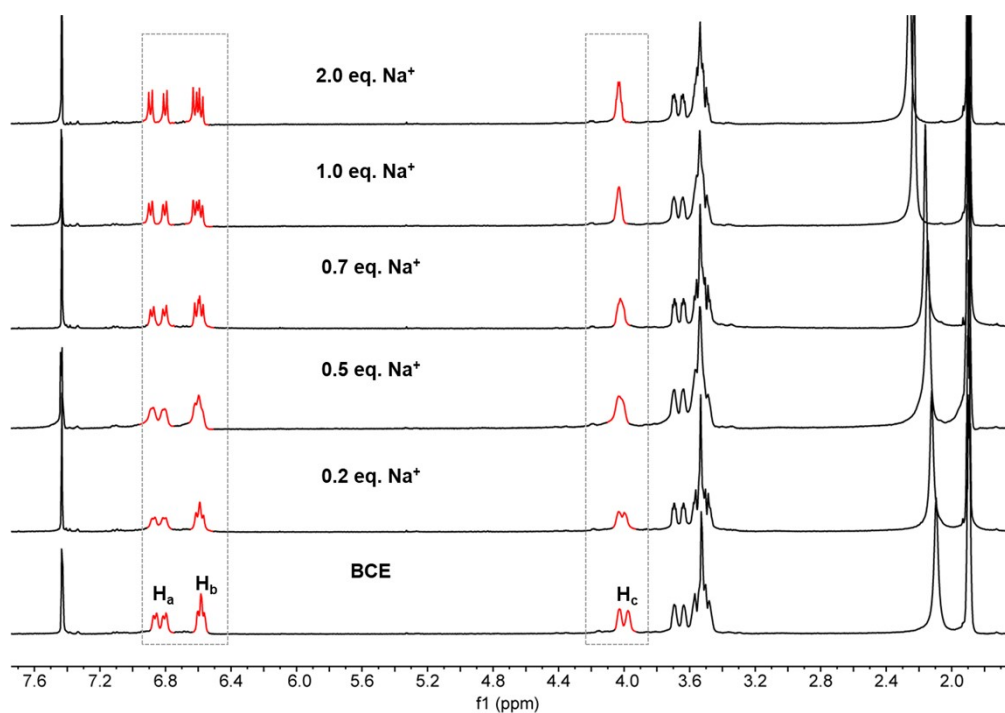

**Fig. S33**  $^1\text{H}$  NMR titration spectra (400 MHz, 298 K) of **BCE** (3.0 mM) titrated by  $\text{Na}^+$  (0-2.0 equiv.) in  $\text{CDCl}_3/\text{CD}_3\text{CN}$  (2:1, v/v), where  $\text{NaPF}_6$  serves as the source of  $\text{Na}^+$ .

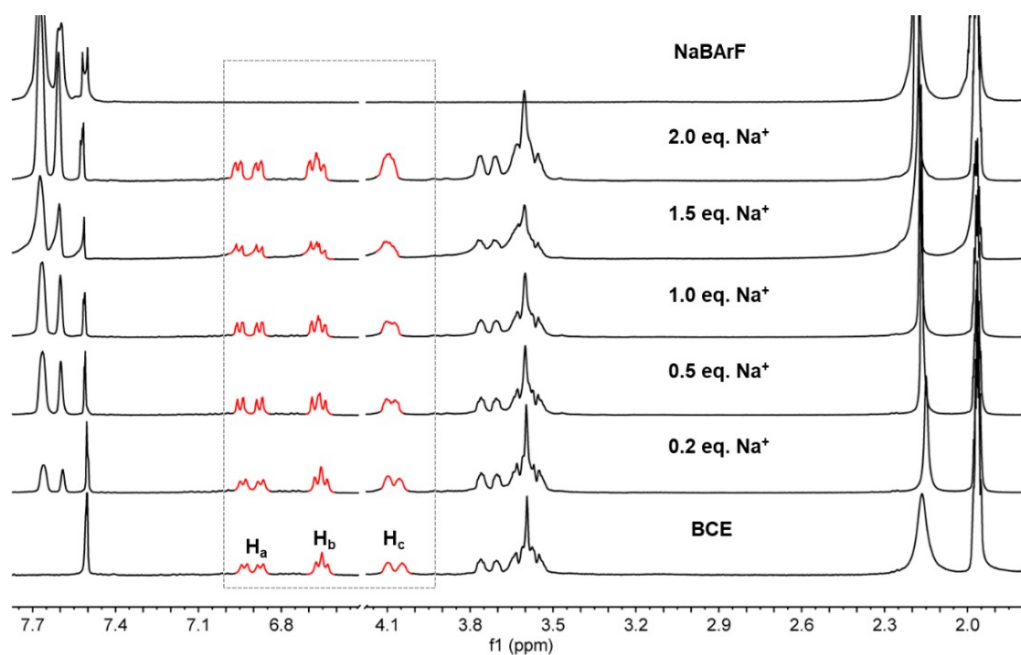

**Fig. S34**  $^1\text{H}$  NMR titration spectra (400 MHz, 298 K) of **BCE** (3.0 mM) titrated by  $\text{Na}^+$  (0-2.0 equiv.) in  $\text{CDCl}_3/\text{CD}_3\text{CN}$  (2:1,  $v/v$ ), where NaBArF serves as the source of  $\text{Na}^+$ .

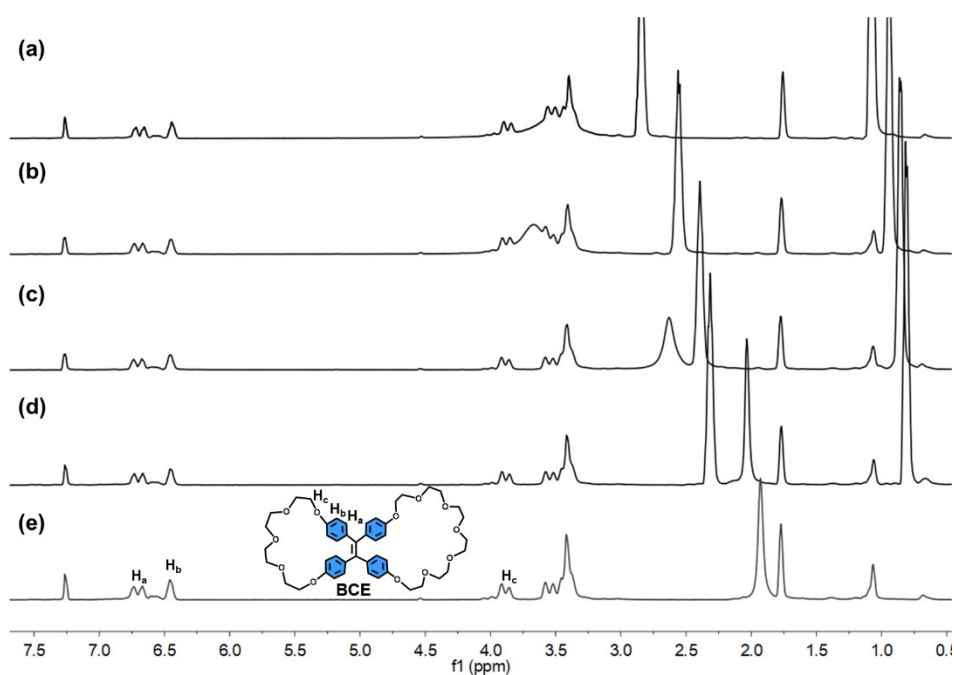

**Fig. S35**  $^1\text{H}$  NMR spectra (400 MHz,  $\text{CDCl}_3/\text{CD}_3\text{CN}$  (2:1,  $v/v$ ), 298 K): (a) **BCE**+ $\text{Et}_3\text{N}$ + $\text{Na}^+$  (2.0 eq.), (b) **BCE**+ $\text{Et}_3\text{N}$ + $\text{Na}^+$  (1.0 eq.), (c) **BCE**+ $\text{Et}_3\text{N}$ + $\text{Na}^+$  (0.5 eq.), (d) **BCE**+ $\text{Et}_3\text{N}$ , and (e) **BCE**.

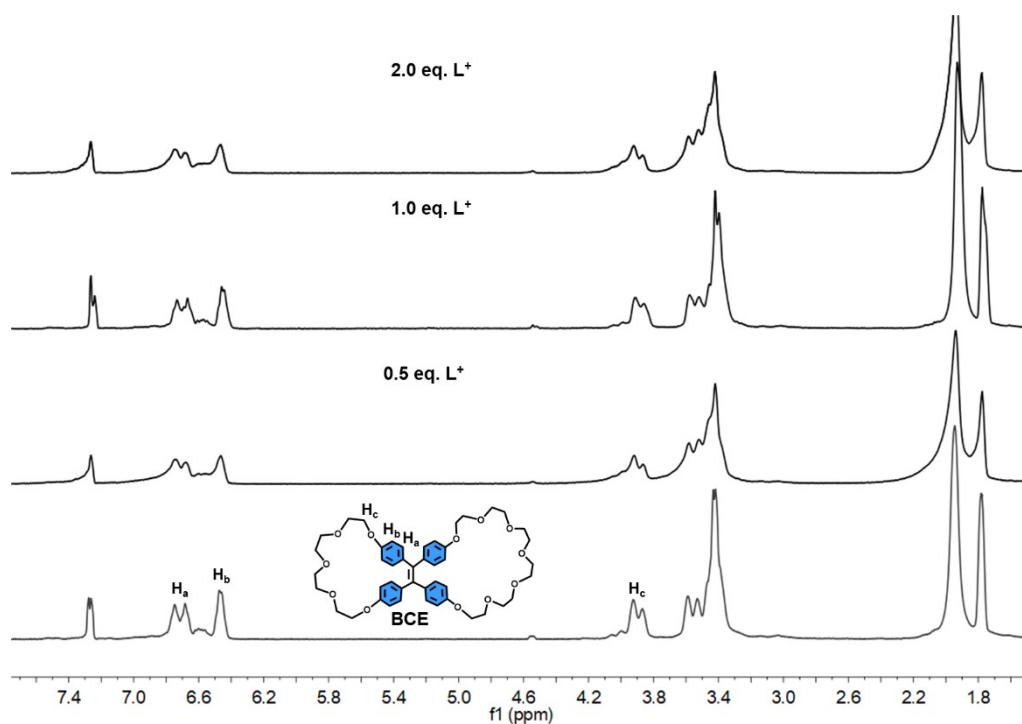

**Fig. S36**  $^1\text{H}$  NMR titration spectra (400 MHz, 298 K) of **BCE** (3.0 mM) titrated by  $\text{Li}^+$  (0-2.0 equiv.) in  $\text{CDCl}_3/\text{CD}_3\text{CN}$  (2:1, v/v), where  $\text{LiPF}_6$  serves as the source of  $\text{Li}^+$ .

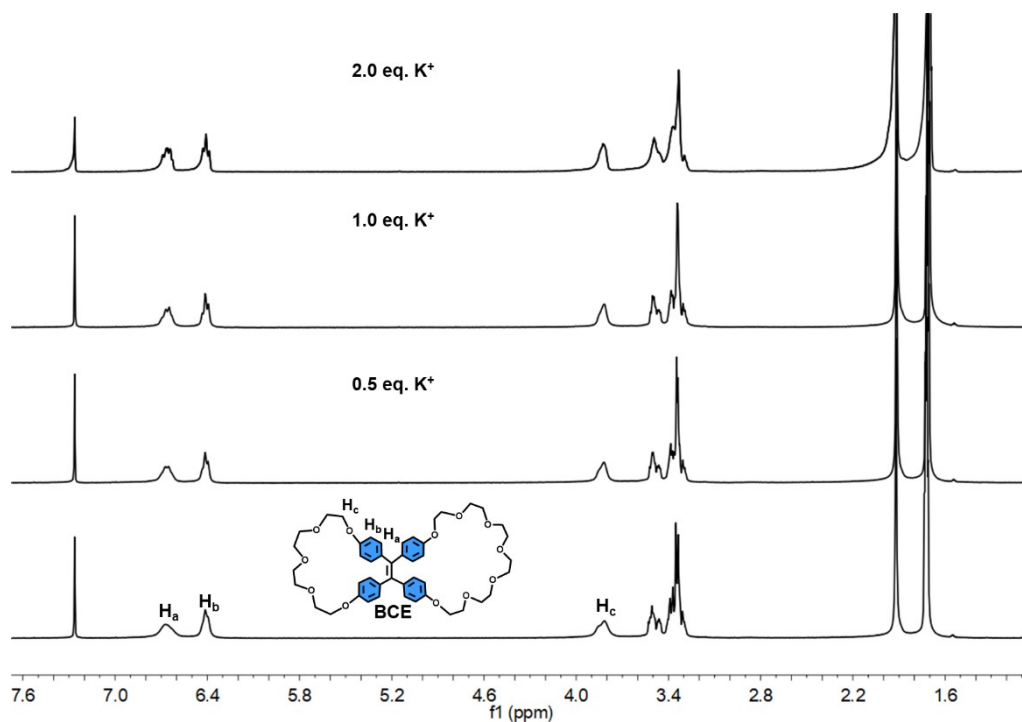

**Fig. S37**  $^1\text{H}$  NMR titration spectra (400 MHz, 298 K) of **BCE** (3.0 mM) titrated by  $\text{K}^+$  (0-2.0 equiv.) in  $\text{CDCl}_3/\text{CD}_3\text{CN}$  (2:1, v/v), where  $\text{KPF}_6$  serves as the source of  $\text{K}^+$ .

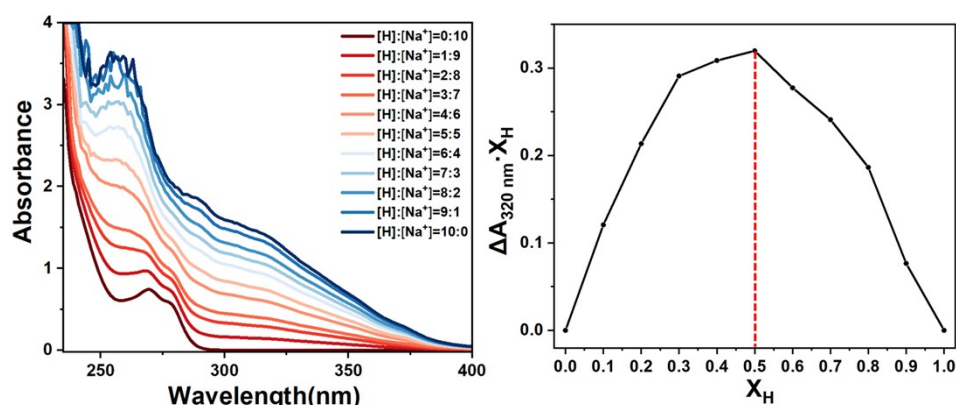

**Fig. S38** UV-vis absorption spectra of **BCE** (H)  $\supset$ Na<sup>+</sup> complex and Job's plot of the 1:1 binding ratio between **BCE** and Na<sup>+</sup> ([**BCE**] + [Na<sup>+</sup>] =  $4.0 \times 10^{-4}$  M, solvent: CDCl<sub>3</sub>/CD<sub>3</sub>CN (2:1, v/v)), where NaBARF serves as the source of Na<sup>+</sup>.

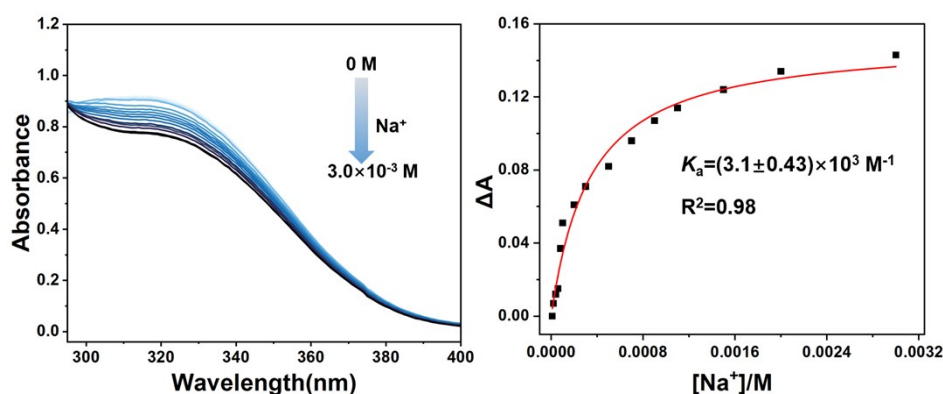

**Fig. S39** UV-vis absorption spectra of **BCE** ( $1.0 \times 10^{-4}$  M) with gradually addition of Na<sup>+</sup> (0- $3.0 \times 10^{-3}$  M) in CDCl<sub>3</sub>/CD<sub>3</sub>CN (2:1, v/v) and the association constant ( $K_a$ ) value of the complex between **BCE** and Na<sup>+</sup>, where NaBARF serves as the source of Na<sup>+</sup>.

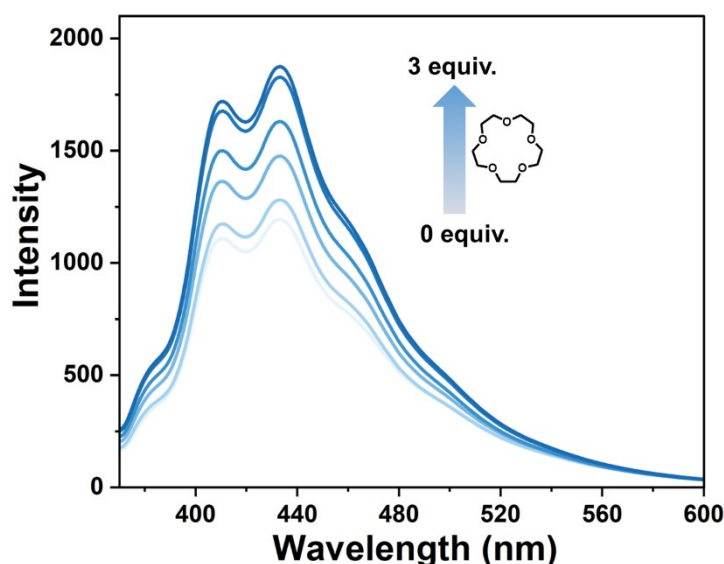

**Fig. S40** Fluorescence titrations of the polymer network **BCE**  $\supset$  **G1** + Na<sup>+</sup> with increasing the concentrations of 15-crown-5 (0 to 3.0 equiv.) in CDCl<sub>3</sub>/CD<sub>3</sub>CN (2:1, v/v). ( $\lambda_{\text{ex}} = 350$  nm, [**BCE**] =  $1 \times 10^{-4}$  M, NaBARF offer Na<sup>+</sup>).

## 6. Stability of the gel BCE $\Rightarrow$ G1 in solution

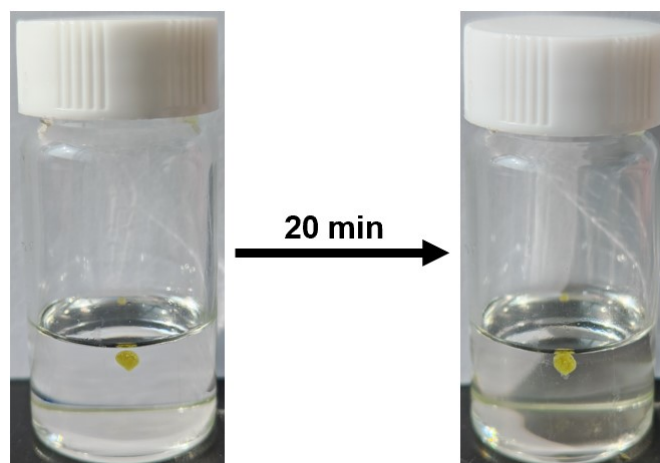

**Fig. S41** The changes of the gel BCE $\Rightarrow$ G1 after being immersed in CDCl<sub>3</sub> for 20 min at room temperature.

It was observed that both the volume and mass of the gel BCE $\Rightarrow$ G1 remained relatively constant before and after the soaking process.

## 7. References

- 1 S. I. J. a. K. K. Jae Wook Lee, *Tetrahedron Lett.*, 2001, **42**, 2709.
- 2 H. O. G. B. W. L. Ligthart, Rint P. Sijbesma, and E. W. Meijer, *J. Am. Chem. Soc.*, 2005, **127**, 810.
- 3 Y.-K. T. L. Chen, Y. Ding, Y.-J. Tian and F. Wang, *Macromolecules*, 2012, **45**, 8412.
- 4 Q. Wang, M. Cheng, J.-L. Jiang and L.-Y. Wang, *Chin. Chem. Lett.*, 2017, **28**, 793.
- 5 J.-T. Shin, S. Shin and C.-G. Cho, *Tetrahedron Lett.*, 2004, **45**, 5857.
- 6 S. Erbas-Cakmak, F. P. Cakmak, S. D. Topel, T. B. Uyar and E. U. Akkaya, *Chem. Commun.*, 2015, **51**, 12258.
- 7 X. Z. Yan, D. H. Xu, X. D. Chi, J. Z. Chen, S. Y. Dong, X. Ding, Y. H. Yu and F. H. Huang, *Adv. Mater.*, 2011, **24**, 362.
